# Supplementary material for: Mucosal effects of tenofovir 1% gel
Source: eLife journal article supplement (doi:10.7554/elife.04525), 2015-02-03

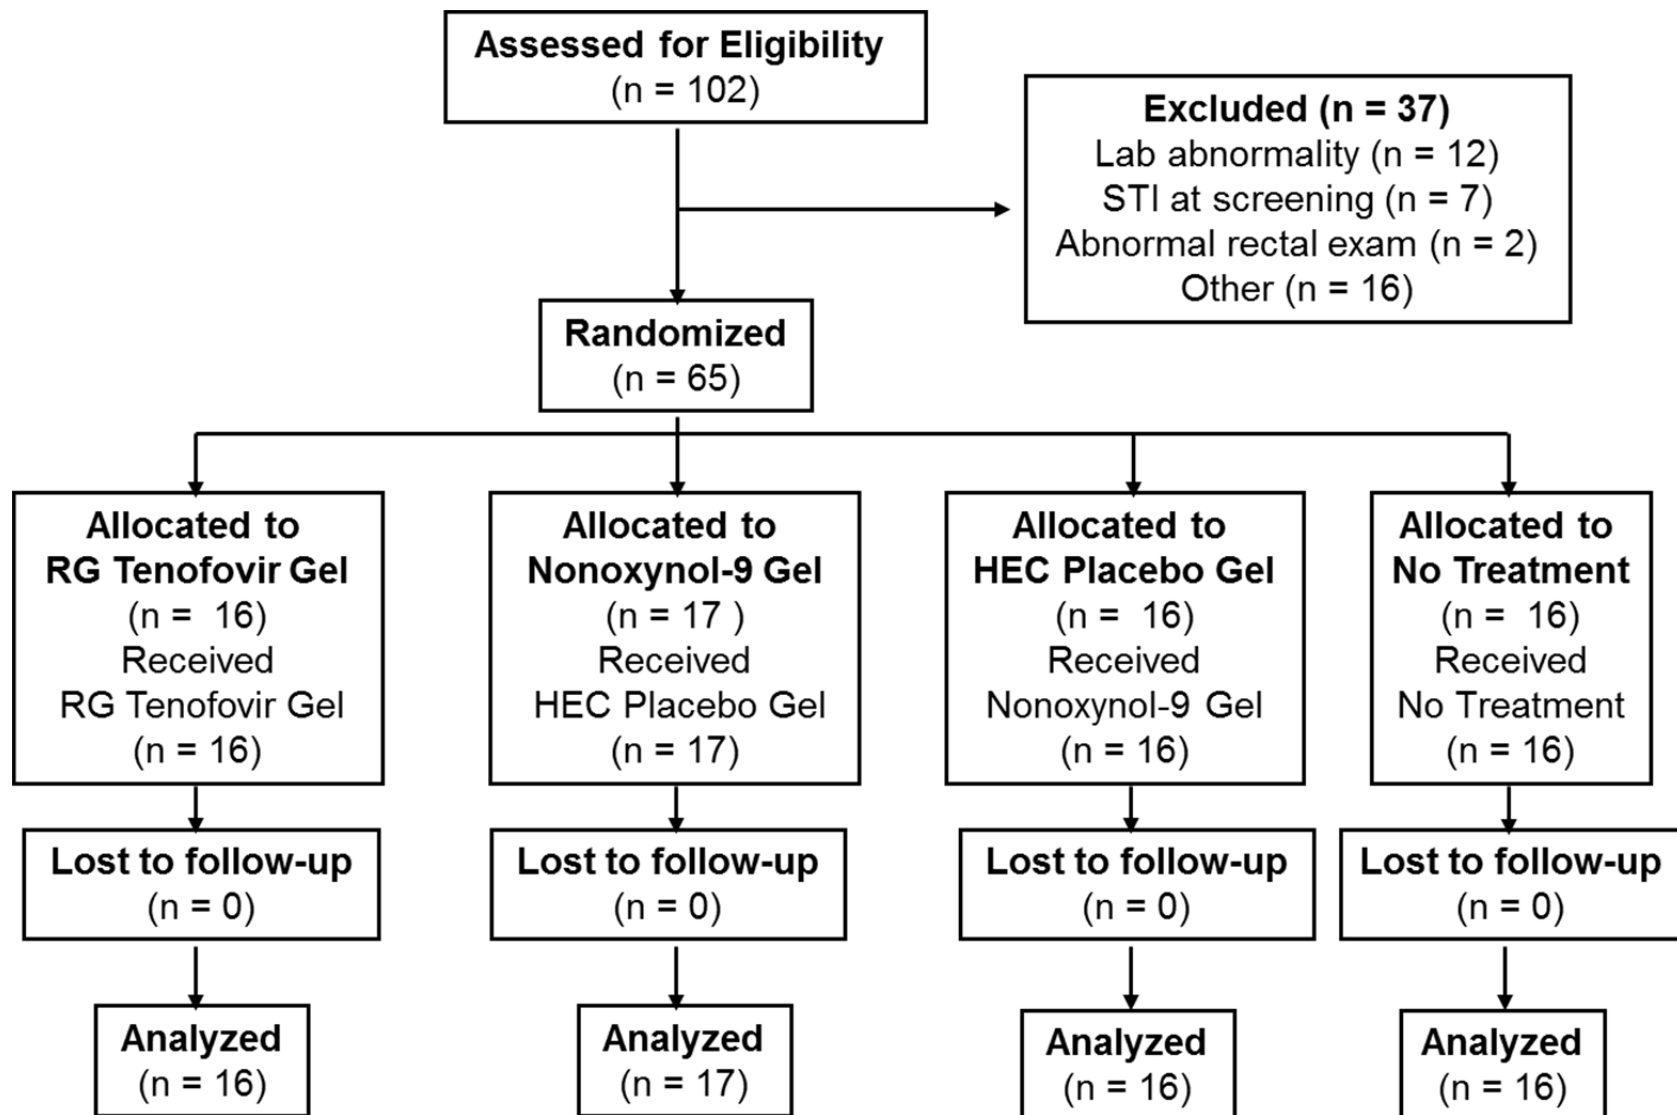

Supplement: supp4 [file elife-04525-supp4-v2.pdf]
