# Supplementary material for: Mucosal effects of tenofovir 1% gel
Source: eLife. 2015 Feb 3;4:e04525. doi: 10.7554/eLife.04525 (PMC4391502; doi:10.7554/eLife.04525)
Supplement: Supplementary file 2. — Lists of genes significantly up- or down-regulated by tenofovir 1% or nonoxynol-9 2% gels in 9 cm rectal biopsies over 7 days of treatment. DOI: http://dx.doi.org/10.7554/eLife.04525.017 [file elife04525s003.xlsx]

## Sheet: Tenofovir DOWN-regulated genes
GENE SYMBOL	ENTREZ_GENE_ID	DEFINITION	SYNONYMS	Mean log2 fold-change (7 days vs baseline)	Adjusted p-value (7 days vs baseline)
PAK2	5062	Homo sapiens p21 (CDKN1A)-activated kinase 2 (PAK2), mRNA.		-3.61227	1.50879e-12
NBPF20	400818	Homo sapiens neuroblastoma breakpoint family, member 20 (NBPF20), mRNA.		-2.60169	3.70629e-05
DDX17	10521	Homo sapiens DEAD (Asp-Glu-Ala-Asp) box polypeptide 17 (DDX17), transcript variant 1, mRNA.	DKFZp761H2016; RH70; P72	-2.58308	5.1027e-07
FBXW7	55294	Homo sapiens F-box and WD repeat domain containing 7 (FBXW7), transcript variant 1, mRNA.	DKFZp686F23254; AGO; CDC4; FBXW6; SEL-10; FBX30; SEL10; FBW7	-2.58286	4.52076e-09
NBPF8	728841	PREDICTED: Homo sapiens neuroblastoma breakpoint family, member 8 (NBPF8), mRNA.		-2.57077	2.74876e-07
ITPRIPL2	162073	Homo sapiens inositol 1,4,5-triphosphate receptor interacting protein-like 2 (ITPRIPL2), mRNA.	MGC126798; FLJ22994; MGC126800	-2.53531	8.20098e-09
RRBP1	6238	Homo sapiens ribosome binding protein 1 homolog 180kDa (dog) (RRBP1), transcript variant 1, mRNA.	DKFZp586A1420; MGC157721; ES130; FLJ36146; MGC157720; ES/130; hES	-2.52934	8.61302e-09
FAM21A	387680	Homo sapiens family with sequence similarity 21, member A (FAM21A), mRNA.	bA56A21.1; FAM21A	-2.485	1.61506e-08
LOC441155	441155	PREDICTED: Homo sapiens similar to Zinc finger CCCH-type domain-containing protein 11A, transcript variant 2 (LOC441155), mRNA.		-2.40521	4.91112e-09
ARID4B	51742	Homo sapiens AT rich interactive domain 4B (RBP1-like) (ARID4B), transcript variant 1, mRNA.	BCAA; RBP1L1; MGC163290; BRCAA1; SAP180; RBBP1L1; DKFZp313M2420	-2.40508	4.52076e-09
NBPF10	440673	Homo sapiens neuroblastoma breakpoint family, member 10 (NBPF10), mRNA.	AG1; AB6	-2.34311	5.34653e-05
LOC100008589	100008589	Homo sapiens 28S ribosomal RNA (LOC100008589), non-coding RNA.		-2.30875	0.0104073
NFAT5	10725	Homo sapiens nuclear factor of activated T-cells 5, tonicity-responsive (NFAT5), transcript variant 5, mRNA.	NFATL1; OREBP; TONEBP; NF-AT5; KIAA0827; NFATZ	-2.2324	9.32593e-09
GOLPH4	27333	Homo sapiens golgi phosphoprotein 4 (GOLPH4), mRNA.	P138; GIMPC; GPP130	-2.21153	1.62909e-08
DSP	1832	Homo sapiens desmoplakin (DSP), transcript variant 1, mRNA.	DPI; DPII	-2.20469	5.45834e-09
VPS13C	54832	Homo sapiens vacuolar protein sorting 13 homolog C (S. cerevisiae) (VPS13C), transcript variant 1B, mRNA.	DKFZp686E0570; FLJ21361	-2.17019	4.52076e-09
LOC642678	642678	PREDICTED: Homo sapiens similar to myeloid/lymphoid or mixed-lineage leukemia 3 isoform 2 (LOC642678), mRNA.		-2.14522	4.52076e-09
GNL3L	54552	Homo sapiens guanine nucleotide binding protein-like 3 (nucleolar)-like (GNL3L), mRNA.	RP11-353K22.1; FLJ10613	-2.11428	1.17559e-06
ZFP91	80829	Homo sapiens zinc finger protein 91 homolog (mouse) (ZFP91), mRNA.	PZF; FKSG11; ZNF757	-2.08112	4.52076e-09
GOLIM4	27333	Homo sapiens golgi integral membrane protein 4 (GOLIM4), mRNA.	P138; GIMPC; GOLPH4; GPP130	-2.07257	1.25711e-08
LOC100132394	100132394	PREDICTED: Homo sapiens hypothetical protein LOC100132394 (LOC100132394), mRNA.		-2.063	0.0130141
CALD1	800	Homo sapiens caldesmon 1 (CALD1), transcript variant 1, mRNA.	L-CAD; CDM; MGC21352; NAG22; H-CAD	-2.03487	7.62958e-07
OSBPL8	114882	Homo sapiens oxysterol binding protein-like 8 (OSBPL8), transcript variant 1, mRNA.	MSTP120; ORP8; MST120; MGC126578; DKFZp686A11164; OSBP10; MGC133203	-2.01895	2.17045e-07
LOC100134364	100134364	PREDICTED: Homo sapiens hypothetical protein LOC100134364 (LOC100134364), mRNA.		-2.01229	0.00701028
DST	667	Homo sapiens dystonin (DST), transcript variant 1, mRNA.	CATX-15; KIAA0465; D6S1101; DMH; BP240; MACF2; BPAG1; KIAA1470; BPA; FLJ46791	-1.9878	8.68113e-08
TMEM45B	120224	Homo sapiens transmembrane protein 45B (TMEM45B), mRNA.	FLJ40787	-1.98657	7.28726e-07
CBX5	23468	Homo sapiens chromobox homolog 5 (HP1 alpha homolog, Drosophila) (CBX5), mRNA.	HP1-ALPHA; HP1; HP1Hs-alpha	-1.98188	1.25711e-08
GK5	256356	Homo sapiens glycerol kinase 5 (putative) (GK5), mRNA.	MGC40579; FLJ45739; FLJ33582	-1.9008	1.14964e-07
NIPAL1	152519	Homo sapiens NIPA-like domain containing 1 (NIPAL1), mRNA.	DKFZp686A06115	-1.90013	1.70211e-07
HRB	3267	Homo sapiens HIV-1 Rev binding protein (HRB), mRNA.	MGC116940; RIP; RAB; MGC116938	-1.86377	2.74876e-07
AAK1	22848	Homo sapiens AP2 associated kinase 1 (AAK1), mRNA.	DKFZp686K16132; MGC164568; FLJ45252; FLJ23712; FLJ25931; KIAA1048; FLJ42882; DKFZp686F03202; MGC164570; FLJ31060; MGC138170	-1.8469	1.61506e-08
RN7SK	125050	Homo sapiens RNA, 7SK small nuclear (RN7SK), non-coding RNA.	7SK	-1.82138	0.000486401
SNORD13	692084	Homo sapiens small nucleolar RNA, C/D box 13 (SNORD13), small nucleolar RNA.	U13	-1.81586	0.00058549
SCP2	6342	Homo sapiens sterol carrier protein 2 (SCP2), transcript variant 1, mRNA.	SCPX; NSL-TP; DKFZp686C12188; NLTP; DKFZp686D11188	-1.80332	3.44907e-05
SCARNA9	619383	Homo sapiens small Cajal body-specific RNA 9 (SCARNA9), guide RNA.	Z32; mgU2-19/30	-1.79791	1.26241e-06
LOC727908	727908	PREDICTED: Homo sapiens hypothetical LOC727908 (LOC727908), partial mRNA.		-1.79556	2.9276e-07
UHMK1	127933	Homo sapiens U2AF homology motif (UHM) kinase 1 (UHMK1), mRNA.	Kist; KIS	-1.79522	4.78033e-08
LOC100133888	100133888	PREDICTED: Homo sapiens similar to SET domain containing (lysine methyltransferase) 8 (LOC100133888), mRNA.		-1.78323	4.01021e-09
LOC100130716	100130716	PREDICTED: Homo sapiens similar to mucin 11 (LOC100130716), mRNA.		-1.78136	0.000251868
PIP5K1B	8395	Homo sapiens phosphatidylinositol-4-phosphate 5-kinase, type I, beta (PIP5K1B), transcript variant 2, mRNA.	MSS4; STM7	-1.77493	2.63087e-06
UGCGL1	56886	Homo sapiens UDP-glucose ceramide glucosyltransferase-like 1 (UGCGL1), transcript variant 1, mRNA.	FLJ23796; HUGT1; FLJ23671	-1.77292	6.48522e-07
GRB2	2885	Homo sapiens growth factor receptor-bound protein 2 (GRB2), transcript variant 1, mRNA.	MST084; ASH; MSTP084; EGFRBP-GRB2; Grb3-3	-1.7697	2.17045e-07
LOC728779	728779	PREDICTED: Homo sapiens hypothetical LOC728779 (LOC728779), mRNA.		-1.76391	7.24435e-06
CDC2L2	728642	Homo sapiens cell division cycle 2-like 2 (PITSLRE proteins) (CDC2L2), transcript variant 1, mRNA. XM_001713745 XM_001713746 XM_001713747	MGC131975; CDK11-p46; PITSLRE; CDC2L3; CDK11-p110; p58GTA; CDK11-p58	-1.75156	2.80508e-06
LOC644162	644162	PREDICTED: Homo sapiens similar to septin 7, transcript variant 4 (LOC644162), mRNA.		-1.72625	1.29489e-06
TAOK1	57551	Homo sapiens TAO kinase 1 (TAOK1), mRNA.	TAO1; MAP3K16; KIAA1361; PSK2; MARKK; FLJ14314	-1.72566	6.10739e-08
CREBBP	1387	Homo sapiens CREB binding protein (CREBBP), transcript variant 1, mRNA.	CBP; KAT3A; RTS; RSTS	-1.72518	8.36835e-09
LOC100133565	100133565	PREDICTED: Homo sapiens similar to hCG23738 (LOC100133565), mRNA.		-1.71206	0.0192504
ZCCHC6	79670	Homo sapiens zinc finger, CCHC domain containing 6 (ZCCHC6), mRNA.	PAPD6; DKFZp686C11112; DKFZp686F119; DKFZp686I1269; DKFZp666B142	-1.70233	5.09283e-07
CLIC5	53405	Homo sapiens chloride intracellular channel 5 (CLIC5), mRNA.	MST130; MSTP130; FLJ90663; dJ447E21.4; CLIC5B	-1.69087	0.00100652
LOC441763	441763	PREDICTED: Homo sapiens hypothetical LOC441763 (LOC441763), mRNA.		-1.68105	0.0261599
NUFIP2	57532	Homo sapiens nuclear fragile X mental retardation protein interacting protein 2 (NUFIP2), mRNA.	82-FIP; PIG1; KIAA1321; MGC117262; FIP-82; 182-FIP	-1.67507	1.61796e-06
RAD21	5885	Homo sapiens RAD21 homolog (S. pombe) (RAD21), mRNA.	KIAA0078; hHR21; NXP1; FLJ40596; HRAD21; FLJ25655; SCC1; HR21; MCD1	-1.66069	1.70625e-06
MATR3	9782	Homo sapiens matrin 3 (MATR3), transcript variant 1, mRNA.	DKFZp686K23100; DKFZp686K0542; KIAA0723; MGC9105	-1.64753	0.000267946
LOC644739	644739	PREDICTED: Homo sapiens similar to Wiskott-Aldrich syndrome protein family member 4 (WASP-family protein member 4), transcript variant 2 (LOC644739), mRNA.		-1.63875	5.45907e-09
LOC100008588	100008588	Homo sapiens 18S ribosomal RNA (LOC100008588), non-coding RNA.		-1.62852	0.0206617
SNRPD3	6634	Homo sapiens small nuclear ribonucleoprotein D3 polypeptide 18kDa (SNRPD3), mRNA.	SMD3	-1.62552	4.18238e-06
GPRIN3	285513	Homo sapiens GPRIN family member 3 (GPRIN3), mRNA.	GRIN3; FLJ42625	-1.62317	7.28726e-07
WHAMM	123720	Homo sapiens WAS protein homolog associated with actin, golgi membranes and microtubules (WHAMM), mRNA.	KIAA1971	-1.60491	3.80239e-07
LOC729513	729513	PREDICTED: Homo sapiens misc_RNA (LOC729513), miscRNA.		-1.60122	1.07409e-06
TFCP2L1	29842	Homo sapiens transcription factor CP2-like 1 (TFCP2L1), mRNA.	LBP-9; LBP9; CRTR1	-1.57992	8.58562e-07
SPIN1	10927	Homo sapiens spindlin 1 (SPIN1), mRNA.	SPIN	-1.57122	7.20966e-07
RNF19A	25897	Homo sapiens ring finger protein 19A (RNF19A), transcript variant 1, mRNA.	DKFZp566B1346; DORFIN	-1.553	4.91212e-08
NUCKS1	64710	Homo sapiens nuclear casein kinase and cyclin-dependent kinase substrate 1 (NUCKS1), mRNA.		-1.54955	0.00627276
RN5S9	100169760	Homo sapiens RNA, 5S ribosomal 9 (RN5S9), ribosomal RNA.		-1.52838	0.000326046
ZNF644	84146	Homo sapiens zinc finger protein 644 (ZNF644), transcript variant 1, mRNA.	BM-005; MGC70410; MGC60165; Zep-2; KIAA1221	-1.50814	4.14493e-07
SF1	7536	Homo sapiens splicing factor 1 (SF1), transcript variant 4, mRNA.	D11S636; ZNF162; ZFM1	-1.49209	2.50578e-05
PDGFA	5154	Homo sapiens platelet-derived growth factor alpha polypeptide (PDGFA), transcript variant 2, mRNA.	PDGF-A; PDGF1	-1.49194	6.69856e-06
SF3B1	23451	Homo sapiens splicing factor 3b, subunit 1, 155kDa (SF3B1), transcript variant 1, mRNA.	PRP10; SF3b155; SAP155; PRPF10	-1.49185	2.40006e-05
TNPO1	3842	Homo sapiens transportin 1 (TNPO1), transcript variant 2, mRNA.	TRN; IPO2; KPNB2; MIP; MIP1	-1.48555	8.60508e-06
CES2	8824	Homo sapiens carboxylesterase 2 (intestine, liver) (CES2), transcript variant 1, mRNA.	iCE; CE-2; CES2A1; PCE-2	-1.47241	1.1332e-05
VPS41	27072	Homo sapiens vacuolar protein sorting 41 homolog (S. cerevisiae) (VPS41), transcript variant 1, mRNA.	hVps41p; HVSP41; HVPS41	-1.46871	1.85494e-06
LOC100133692	100133692	PREDICTED: Homo sapiens similar to cell division cycle 2-like 1 (PITSLRE proteins) (LOC100133692), mRNA.		-1.45811	3.62882e-06
BRI3BP	140707	Homo sapiens BRI3 binding protein (BRI3BP), mRNA.	HCCR-2; BNAS1; KG19	-1.4478	5.26525e-07
HOOK1	51361	Homo sapiens hook homolog 1 (Drosophila) (HOOK1), mRNA.	MGC10642; HK1	-1.44114	0.000667011
SPATA13	221178	Homo sapiens spermatogenesis associated 13 (SPATA13), mRNA.	FLJ31208; MGC129989; FLJ35435; ASEF2; MGC129988; RP11-307N16.3	-1.43442	6.04591e-08
FAM21C	253725	Homo sapiens family with sequence similarity 21, member C (FAM21C), mRNA.	KIAA0592; FAM21A	-1.42846	2.31261e-08
LOC100133950	100133950	PREDICTED: Homo sapiens hypothetical protein LOC100133950 (LOC100133950), mRNA.		-1.42562	9.21691e-06
FAM23A	653567	Homo sapiens family with sequence similarity 23, member A (FAM23A), mRNA.	bA16O1.2	-1.41913	1.86246e-06
LOC100131360	100131360	PREDICTED: Homo sapiens misc_RNA (LOC100131360), miscRNA.		-1.41588	4.66274e-06
LOC100133800	100133800	PREDICTED: Homo sapiens misc_RNA (LOC100133800), miscRNA.		-1.40801	5.10091e-08
LOC730995	730995	PREDICTED: Homo sapiens similar to ankyrin repeat domain 36 (LOC730995), mRNA.		-1.40265	1.0791e-06
EIF3CL	728689	Homo sapiens eukaryotic translation initiation factor 3, subunit C-like (EIF3CL), mRNA.		-1.39986	0.00293349
ANKRD36B	57730	Homo sapiens ankyrin repeat domain 36B (ANKRD36B), mRNA.	MGC149865; MGC167812; FLJ21281; FLJ90089; MGC149864	-1.3996	1.86246e-06
RNU1A3	26871	Homo sapiens RNA, U1A3 small nuclear (RNU1A3), small nuclear RNA.	HSD1; U1A1	-1.38749	0.000691006
DTWD2	285605	Homo sapiens DTW domain containing 2 (DTWD2), mRNA.	MGC138579; MGC138580; FLJ33977	-1.37481	0.000467673
LOC728518	728518	PREDICTED: Homo sapiens hypothetical LOC728518 (LOC728518), mRNA.		-1.37358	9.18275e-08
MBNL3	55796	Homo sapiens muscleblind-like 3 (Drosophila) (MBNL3), transcript variant R, mRNA.	MBLX39; MBLX; FLJ11316; CHCR; MBXL	-1.37039	3.59605e-08
PPFIBP1	8496	Homo sapiens PTPRF interacting protein, binding protein 1 (liprin beta 1) (PPFIBP1), transcript variant 1, mRNA.	hSgt2p; L2; hSGT2	-1.36979	3.24922e-07
GCC2	9648	Homo sapiens GRIP and coiled-coil domain containing 2 (GCC2), transcript variant 1, mRNA.	KIAA0336; GCC185	-1.36974	1.02902e-07
THOC2	57187	Homo sapiens THO complex 2 (THOC2), transcript variant 2, mRNA.	CXorf3; dJ506G2.1; THO2	-1.36717	6.37365e-06
PLCB4	5332	Homo sapiens phospholipase C, beta 4 (PLCB4), transcript variant 1, mRNA.	PI-PLC; FLJ16169	-1.36404	2.9276e-07
BCLAF1	9774	Homo sapiens BCL2-associated transcription factor 1 (BCLAF1), transcript variant 2, mRNA.	BTF; bK211L9.1; KIAA0164	-1.35678	3.84704e-08
LOC100132585	100132585	PREDICTED: Homo sapiens hypothetical protein LOC100132585 (LOC100132585), mRNA.		-1.35669	0.00262118
DDX6	1656	Homo sapiens DEAD (Asp-Glu-Ala-Asp) box polypeptide 6 (DDX6), mRNA.	P54; HLR2; FLJ36338; RCK	-1.3552	7.02431e-07
SSH1	54434	Homo sapiens slingshot homolog 1 (Drosophila) (SSH1), mRNA.	SSH-1; FLJ38102; KIAA1298	-1.33251	1.15832e-06
C8orf45	157777	Homo sapiens chromosome 8 open reading frame 45 (C8orf45), mRNA.	FLJ25692	-1.31927	0.00413453
EIF2C2	27161	Homo sapiens eukaryotic translation initiation factor 2C, 2 (EIF2C2), mRNA.	MGC3183; Q10; AGO2	-1.31916	0.000210778
NFIC	4782	Homo sapiens nuclear factor I/C (CCAAT-binding transcription factor) (NFIC), transcript variant 2, mRNA.	CTF5; CTF; NF-I; NFI; MGC20153	-1.31704	0.000262033
TGFBRAP1	9392	Homo sapiens transforming growth factor, beta receptor associated protein 1 (TGFBRAP1), mRNA.	TRAP-1; TRAP1	-1.31315	8.83466e-07
RBM39	9584	Homo sapiens RNA binding motif protein 39 (RBM39), transcript variant 1, mRNA.	DKFZp781C0423; RNPC2; CC1.3; CAPER; CAPERalpha; HCC1; FLJ44170	-1.30922	0.000102085
FLJ44124	641737	Homo sapiens hypothetical protein LOC641737 (FLJ44124), mRNA.	FLJ26154	-1.30352	0.000793225
RGPD8	727851	PREDICTED: Homo sapiens RANBP2-like and GRIP domain containing 8 (RGPD8), mRNA.		-1.30257	6.8551e-05
UBN2	254048	Homo sapiens ubinuclein 2 (UBN2), mRNA.		-1.29696	1.00585e-07
FLJ20309	54891	Homo sapiens hypothetical protein FLJ20309 (FLJ20309), mRNA.		-1.29584	1.08319e-07
LOC648509	648509	PREDICTED: Homo sapiens similar to plakophilin 4 isoform a (LOC648509), mRNA.		-1.29233	1.31348e-06
MEF2A	4205	Homo sapiens myocyte enhancer factor 2A (MEF2A), mRNA.	ADCAD1; RSRFC9; RSRFC4	-1.28888	3.29867e-07
BAGE5	85316	Homo sapiens B melanoma antigen family, member 5 (BAGE5), mRNA.		-1.28611	5.10091e-08
TPM3	7170	Homo sapiens tropomyosin 3 (TPM3), transcript variant 1, mRNA.	TM30; MGC3261; TRK; NEM1; TM30nm; FLJ41118; OK/SW-cl.5; TM-5; TPMsk3; hscp30; MGC14582; TM3; MGC72094	-1.28413	0.00247347
PCYOX1	51449	Homo sapiens prenylcysteine oxidase 1 (PCYOX1), mRNA.	KIAA0908; PCL1	-1.27908	0.00335818
LOC644330	644330	PREDICTED: Homo sapiens similar to tropomyosin 3 isoform 2 (LOC644330), mRNA.		-1.27387	0.000931845
ENTPD5	957	Homo sapiens ectonucleoside triphosphate diphosphohydrolase 5 (ENTPD5), mRNA.	NTPDase-5; MGC163357; PCPH; CD39L4; MGC163359	-1.27265	1.00187e-05
DDX27	55661	Homo sapiens DEAD (Asp-Glu-Ala-Asp) box polypeptide 27 (DDX27), mRNA.	HSPC259; RHLP; FLJ12917; DKFZp667N057; Rrp3p; MGC163147; MGC1018; FLJ22238; dJ686N3.1; PP3241; FLJ20596	-1.27067	4.51625e-06
LOC440345	440345	PREDICTED: Homo sapiens hypothetical protein LOC440345, transcript variant 6 (LOC440345), mRNA.		-1.26746	0.00428549
LOC646786	646786	PREDICTED: Homo sapiens similar to Afadin (AF-6 protein) (LOC646786), mRNA.		-1.26683	0.00101
BRWD1	54014	Homo sapiens bromodomain and WD repeat domain containing 1 (BRWD1), transcript variant 2, mRNA.	C21orf107; FLJ43918; WDR9; N143	-1.26521	9.21691e-06
NSUN5B	155400	Homo sapiens NOP2/Sun domain family, member 5B (NSUN5B), transcript variant 1, mRNA.	WBSCR20B; MGC129801	-1.26437	4.37076e-05
ZNF669	79862	Homo sapiens zinc finger protein 669 (ZNF669), mRNA.	FLJ12606	-1.26397	1.25279e-05
ZKSCAN1	7586	Homo sapiens zinc finger with KRAB and SCAN domains 1 (ZKSCAN1), mRNA.	MGC138429; 9130423L19Rik; KOX18; ZNF139; PHZ-37; ZNF36	-1.26253	3.80096e-07
LOC652726	652726	PREDICTED: Homo sapiens similar to ankyrin repeat domain 36 (LOC652726), mRNA.		-1.25888	1.53218e-05
BLZF1	8548	Homo sapiens basic leucine zipper nuclear factor 1 (BLZF1), mRNA.	JEM1; JEM-1; GOLGIN-45; MGC22497; JEM-1s	-1.25455	0.000733258
FAM129A	116496	Homo sapiens family with sequence similarity 129, member A (FAM129A), transcript variant 2, mRNA.	NIBAN; FLJ38228; C1orf24	-1.246	9.61997e-05
OPA3	80207	Homo sapiens optic atrophy 3 (autosomal recessive, with chorea and spastic paraplegia) (OPA3), transcript variant 2, mRNA.	FLJ25932; MGC75494; MGA3; FLJ22187	-1.24106	0.000793074
TBC1D23	55773	Homo sapiens TBC1 domain family, member 23 (TBC1D23), mRNA.	NS4ATP1; FLJ11046; DKFZp667G062	-1.23332	4.03935e-05
VAPB	9217	Homo sapiens VAMP (vesicle-associated membrane protein)-associated protein B and C (VAPB), mRNA.	VAMP-B; ALS8; VAP-B; VAP-C; VAMP-C	-1.23086	3.80239e-07
LOC729992	729992	PREDICTED: Homo sapiens misc_RNA (LOC729992), miscRNA.		-1.22652	8.87271e-06
LOC654069	654069	PREDICTED: Homo sapiens similar to R3H domain protein KIAA1002, transcript variant 1 (LOC654069), mRNA.		-1.22525	7.28726e-07
LOC645159	645159	PREDICTED: Homo sapiens similar to ALR-like protein (LOC645159), mRNA.		-1.22148	6.34385e-07
PDE8A	5151	Homo sapiens phosphodiesterase 8A (PDE8A), transcript variant 1, mRNA.	HsT19550; FLJ16150	-1.21752	5.10097e-05
FKBP14	55033	Homo sapiens FK506 binding protein 14, 22 kDa (FKBP14), mRNA.	FLJ20731; FKBP22	-1.2148	0.00495399
UGCG	7357	Homo sapiens UDP-glucose ceramide glucosyltransferase (UGCG), mRNA.	GCS	-1.2136	0.000977853
DDX51	317781	Homo sapiens DEAD (Asp-Glu-Ala-Asp) box polypeptide 51 (DDX51), mRNA.	DKFZp686N2081; MGC42193	-1.21229	0.0053163
LOC400986	400986	PREDICTED: Homo sapiens protein immuno-reactive with anti-PTH polyclonal antibodies (LOC400986), mRNA.		-1.21084	2.93403e-06
TNFAIP8L1	126282	Homo sapiens tumor necrosis factor, alpha-induced protein 8-like 1 (TNFAIP8L1), mRNA.	MGC17791	-1.2107	2.21936e-05
LOC100133760	100133760	PREDICTED: Homo sapiens similar to Jumonji, AT rich interactive domain 1B (RBP2-like) (LOC100133760), partial mRNA.		-1.20723	7.28726e-07
OCIAD1	54940	Homo sapiens OCIA domain containing 1 (OCIAD1), transcript variant 5, mRNA.	TPA018; MGC111072; FLJ20455; Asrij; OCIA	-1.20087	0.00260028
LARP1B	55132	Homo sapiens La ribonucleoprotein domain family, member 1B (LARP1B), transcript variant 1, mRNA.	MGC75174; DKFZp686L13217; MGC117277	-1.19953	7.02431e-07
HIPK2	28996	Homo sapiens homeodomain interacting protein kinase 2 (HIPK2), mRNA.	PRO0593	-1.19641	0.0053163
LOC642033	642033	PREDICTED: Homo sapiens similar to ATP-binding cassette, sub-family F, member 1 isoform b (LOC642033), mRNA.		-1.19475	2.80508e-06
CCBE1	147372	Homo sapiens collagen and calcium binding EGF domains 1 (CCBE1), mRNA.	FLJ30681; MGC50861	-1.19421	0.00584455
KCTD12	115207	Homo sapiens potassium channel tetramerisation domain containing 12 (KCTD12), mRNA.	FLJ33073; KIAA1778; C13orf2; PFET1	-1.19096	0.00174154
LOC730052	730052	PREDICTED: Homo sapiens misc_RNA (LOC730052), miscRNA.		-1.18693	1.65597e-05
RORA	6095	Homo sapiens RAR-related orphan receptor A (RORA), transcript variant 3, mRNA.	NR1F1; MGC119326; ROR2; RZRA; ROR1; MGC119329; ROR3	-1.18481	1.91345e-06
LOC389286	389286	Homo sapiens similar to FKSG62 (LOC389286), mRNA.	FKSG69	-1.18467	0.000463268
DFFA	1676	Homo sapiens DNA fragmentation factor, 45kDa, alpha polypeptide (DFFA), transcript variant 1, mRNA.	DFF-45; ICAD; DFF1	-1.18052	0.000256192
LIPH	200879	Homo sapiens lipase, member H (LIPH), mRNA.	mPA-PLA1 alpha; PLA1B; mPA-PLA1	-1.17625	7.08932e-06
EXPH5	23086	Homo sapiens exophilin 5 (EXPH5), mRNA.	SLAC2-B; KIAA0624; DKFZp781H0795; MGC134967; MGC133291	-1.17569	0.00139998
DYRK2	8445	Homo sapiens dual-specificity tyrosine-(Y)-phosphorylation regulated kinase 2 (DYRK2), transcript variant 1, mRNA.		-1.17108	0.00668365
TPM4	7171	Homo sapiens tropomyosin 4 (TPM4), mRNA.		-1.17059	6.23252e-06
TMOD3	29766	Homo sapiens tropomodulin 3 (ubiquitous) (TMOD3), mRNA.	UTMOD	-1.16462	2.94591e-05
MCART1	92014	Homo sapiens mitochondrial carrier triple repeat 1 (MCART1), mRNA.	CG7943; MGC14836	-1.16129	0.00379338
ZNF682	91120	Homo sapiens zinc finger protein 682 (ZNF682), transcript variant 1, mRNA.	FLJ90362; BC39498_3	-1.16119	0.00716451
NFATC2IP	84901	Homo sapiens nuclear factor of activated T-cells, cytoplasmic, calcineurin-dependent 2 interacting protein (NFATC2IP), mRNA.	MGC138387; FLJ14639; MGC126790	-1.15815	5.26525e-07
LOC202781	202781	PREDICTED: Homo sapiens hypothetical protein LOC202781 (LOC202781), mRNA.		-1.15514	0.00100172
LOC728809	728809	PREDICTED: Homo sapiens hypothetical LOC728809 (LOC728809), mRNA.		-1.15384	0.0100158
USP49	25862	Homo sapiens ubiquitin specific peptidase 49 (USP49), mRNA.	MGC20741	-1.15018	0.00398214
COL4A3BP	10087	Homo sapiens collagen, type IV, alpha 3 (Goodpasture antigen) binding protein (COL4A3BP), transcript variant 1, mRNA.	GPBP; STARD11; FLJ20597; CERTL; CERT	-1.15015	0.00105715
BAG4	9530	Homo sapiens BCL2-associated athanogene 4 (BAG4), mRNA.	SODD; BAG-4	-1.14883	1.07409e-06
PPIG	9360	Homo sapiens peptidylprolyl isomerase G (cyclophilin G) (PPIG), mRNA.	CYP; SRCyp; MGC133241; CARS-Cyp	-1.1463	4.61941e-07
CARS	833	Homo sapiens cysteinyl-tRNA synthetase (CARS), transcript variant 4, mRNA.	CARS1; CYSRS; MGC:11246	-1.14406	6.34572e-07
MAGT1	84061	Homo sapiens magnesium transporter 1 (MAGT1), mRNA.	RP11-217H1.1; OST3B; IAP; bA217H1.1; PRO0756; DKFZp564K142; MGC64926; FLJ14726	-1.13948	0.00365591
C15orf63	25764	Homo sapiens chromosome 15 open reading frame 63 (C15orf63), mRNA.	HSPC136	-1.13591	0.00451131
BIRC3	330	Homo sapiens baculoviral IAP repeat-containing 3 (BIRC3), transcript variant 1, mRNA.	RNF49; MALT2; MIHC; HAIP1; API2; HIAP1; AIP1; CIAP2	-1.13536	2.23852e-05
NLRP8	126205	Homo sapiens NLR family, pyrin domain containing 8 (NLRP8), mRNA.	NALP8; CLR19.2; PAN4; NOD16	-1.13474	0.00740545
PPARGC1B	133522	Homo sapiens peroxisome proliferator-activated receptor gamma, coactivator 1 beta (PPARGC1B), mRNA.	PGC-1(beta); PERC; PGC1B	-1.13321	0.00031826
SPTBN1	6711	Homo sapiens spectrin, beta, non-erythrocytic 1 (SPTBN1), transcript variant 1, mRNA.	SPTB2; ELF; betaSpII	-1.1247	0.000376409
C2orf69	205327	Homo sapiens chromosome 2 open reading frame 69 (C2orf69), mRNA.		-1.12348	0.00145591
TMEM189-UBE2V1	387522	Homo sapiens TMEM189-UBE2V1 readthrough transcript (TMEM189-UBE2V1), transcript variant 2, mRNA.	UBE2V1; Kua-UEV; CROC-1B	-1.11956	2.66172e-05
MBP	4155	Homo sapiens myelin basic protein (MBP), transcript variant 3, mRNA.	MGC99675	-1.11751	0.000289929
CUEDC1	404093	Homo sapiens CUE domain containing 1 (CUEDC1), mRNA.	DKFZp547L163; FLJ20739	-1.11722	0.00049279
MUC12	10071	Homo sapiens mucin 12, cell surface associated (MUC12), mRNA.		-1.11631	0.000465839
SETX	23064	Homo sapiens senataxin (SETX), mRNA.	KIAA0625; ALS4; FLJ43459; FLJ12840; bA479K20.2; DKFZp781B151; SCAR1; AOA2	-1.11048	2.63087e-06
TYW3	127253	Homo sapiens tRNA-yW synthesizing protein 3 homolog (S. cerevisiae) (TYW3), mRNA.	C1orf171; FLJ40918	-1.10218	1.65597e-05
IL10	3586	Homo sapiens interleukin 10 (IL10), mRNA.	CSIF; IL-10; IL10A; MGC126451; TGIF; MGC126450	-1.10077	0.00141109
RNU1-5	26863	Homo sapiens RNA, U1 small nuclear 5 (RNU1-5), small nuclear RNA.	HSD4	-1.0975	0.00262118
LOC729222	729222	PREDICTED: Homo sapiens misc_RNA (LOC729222), miscRNA.		-1.09604	4.14493e-07
LOC649841	649841	PREDICTED: Homo sapiens similar to protein immuno-reactive with anti-PTH polyclonal antibodies (LOC649841), mRNA.		-1.09544	0.00122069
ZNF483	158399	Homo sapiens zinc finger protein 483 (ZNF483), transcript variant 2, mRNA.	ZKSCAN16	-1.09484	0.00359725
LOC731777	731777	PREDICTED: Homo sapiens similar to heat shock 70kD protein binding protein (LOC731777), mRNA.		-1.09419	9.61997e-05
KIF1B	23095	Homo sapiens kinesin family member 1B (KIF1B), transcript variant 1, mRNA.	KIAA0591; HMSNII; CMT2; FLJ23699; KIAA1448; CMT2A; MGC134844; CMT2A1; KLP	-1.09259	2.98234e-07
LOC255167	255167	Homo sapiens hypothetical LOC255167 (LOC255167), non-coding RNA.		-1.09128	0.0103776
ZNF69	7620	Homo sapiens zinc finger protein 69 (ZNF69), mRNA.	MGC59928; Cos5	-1.09037	0.00922881
LOC645452	645452	PREDICTED: Homo sapiens similar to hCG1782414 (LOC645452), mRNA.		-1.08806	0.00652181
TNRC6B	23112	Homo sapiens trinucleotide repeat containing 6B (TNRC6B), transcript variant 2, mRNA.	KIAA1093	-1.08727	0.000426019
USP2	9099	Homo sapiens ubiquitin specific peptidase 2 (USP2), transcript variant 1, mRNA.	USP9; UBP41	-1.08678	0.00031826
LOC100131989	100131989	PREDICTED: Homo sapiens hypothetical protein LOC100131989 (LOC100131989), mRNA.		-1.07621	0.00163389
CDCP1	64866	Homo sapiens CUB domain containing protein 1 (CDCP1), transcript variant 2, mRNA.	SIMA135; TRASK; CD318	-1.07588	7.24435e-06
MCM8	84515	Homo sapiens minichromosome maintenance complex component 8 (MCM8), transcript variant 1, mRNA.	C20orf154; dJ967N21.5; MGC119522; MGC4816; MGC12866; REC; MGC119523	-1.07441	0.00313903
LOC648526	648526	PREDICTED: Homo sapiens similar to epiplakin 1 (LOC648526), mRNA.		-1.07383	0.000251868
SGK3	23678	Homo sapiens serum/glucocorticoid regulated kinase family, member 3 (SGK3), transcript variant 2, mRNA.	SGK2; CISK; DKFZp781N0293; SGKL	-1.07378	6.48522e-07
LOC100128062	100128062	PREDICTED: Homo sapiens misc_RNA (LOC100128062), miscRNA.		-1.07289	0.000977853
CSF2RA	1438	PREDICTED: Homo sapiens colony stimulating factor 2 receptor, alpha, low-affinity (granulocyte-macrophage) (CSF2RA), mRNA.		-1.07129	0.00224858
C6orf106	64771	Homo sapiens chromosome 6 open reading frame 106 (C6orf106), transcript variant 1, mRNA.	FP852; FLJ32402; MGC4614; dJ391O22.4; RP3-391O22.4; FLJ22195	-1.07053	4.06307e-06
LOC643287	643287	PREDICTED: Homo sapiens similar to prothymosin alpha, transcript variant 1 (LOC643287), mRNA.		-1.06903	0.000260144
C21orf58	54058	Homo sapiens chromosome 21 open reading frame 58 (C21orf58), mRNA.		-1.06665	0.00218591
UBE2H	7328	Homo sapiens ubiquitin-conjugating enzyme E2H (UBC8 homolog, yeast) (UBE2H), transcript variant 1, mRNA.	E2-20K; UBCH; UBC8; UBCH2	-1.06622	7.28726e-07
KRCC1	51315	Homo sapiens lysine-rich coiled-coil 1 (KRCC1), mRNA.	FLJ22333; CHBP2	-1.06593	4.18238e-06
TAF13	6884	Homo sapiens TAF13 RNA polymerase II, TATA box binding protein (TBP)-associated factor, 18kDa (TAF13), mRNA.	TAFII18; MGC22425; TAF2K	-1.06591	3.21602e-05
DENR	8562	Homo sapiens density-regulated protein (DENR), mRNA.	DRP; DRP1; SMAP-3	-1.06564	0.0011342
YWHAE	7531	Homo sapiens tyrosine 3-monooxygenase/tryptophan 5-monooxygenase activation protein, epsilon polypeptide (YWHAE), mRNA.	KCIP-1; MDS; FLJ45465; MDCR; 14-3-3E	-1.0579	8.36865e-05
PLEKHB2	55041	Homo sapiens pleckstrin homology domain containing, family B (evectins) member 2 (PLEKHB2), transcript variant 2, mRNA.	EVT2; FLJ20783	-1.05546	0.0126781
GTF2A1	2957	Homo sapiens general transcription factor IIA, 1, 19/37kDa (GTF2A1), transcript variant 2, mRNA.	MGC129969; TF2A1; TFIIA; MGC129970	-1.05342	5.26525e-07
PPDPF	79144	Homo sapiens pancreatic progenitor cell differentiation and proliferation factor homolog (zebrafish) (PPDPF), mRNA.	dJ697K14.9; FLJ21046; MGC2479	-1.05102	0.000171377
PIP5K2B	8396	Homo sapiens phosphatidylinositol-4-phosphate 5-kinase, type II, beta (PIP5K2B), transcript variant 2, mRNA.	Pip4k2B; PIP5KIIB	-1.05016	0.00505553
RUNDC2C	440352	Homo sapiens RUN domain containing 2C (RUNDC2C), non-coding RNA.		-1.04911	9.99566e-06
FLJ36131	338999	PREDICTED: Homo sapiens hypothetical protein FLJ36131, transcript variant 2 (FLJ36131), mRNA.		-1.04898	0.0107335
FLJ25363	401082	PREDICTED: Homo sapiens similar to hypothetical protein FLJ25976 (FLJ25363), mRNA.		-1.04861	0.00244577
TRIM13	10206	Homo sapiens tripartite motif-containing 13 (TRIM13), transcript variant 4, mRNA.	RNF77; CAR; LEU5; RFP2; DLEU5	-1.04803	0.00342055
ATP1B1	481	Homo sapiens ATPase, Na+/K+ transporting, beta 1 polypeptide (ATP1B1), transcript variant 1, mRNA.	MGC1798; ATP1B	-1.04694	0.000557784
ZNF394	84124	Homo sapiens zinc finger protein 394 (ZNF394), mRNA.	FLJ12298; ZKSCAN14	-1.04648	0.0103776
LOC100132391	100132391	PREDICTED: Homo sapiens hypothetical protein LOC100132391 (LOC100132391), mRNA.		-1.04634	0.0216787
ENTPD4	9583	Homo sapiens ectonucleoside triphosphate diphosphohydrolase 4 (ENTPD4), mRNA.	KIAA0392; NTPDase-4; UDPase; LYSAL1; LALP70; LAP70	-1.04405	0.00017288
LOC653808	653808	PREDICTED: Homo sapiens similar to zymogen granule protein 16 (LOC653808), mRNA.		-1.04348	5.77412e-05
ZNF14	7561	Homo sapiens zinc finger protein 14 (ZNF14), mRNA.	GIOT-4; KOX6	-1.04234	0.00797262
TMEM17	200728	Homo sapiens transmembrane protein 17 (TMEM17), mRNA.	FLJ34583	-1.04119	0.0160519
ZNF652	22834	Homo sapiens zinc finger protein 652 (ZNF652), mRNA.	KIAA0924; DKFZp781E2122	-1.0387	0.00505553
ALPP	250	Homo sapiens alkaline phosphatase, placental (Regan isozyme) (ALPP), mRNA.	PLAP; ALP	-1.03733	0.00365982
ANKRD36	375248	Homo sapiens ankyrin repeat domain 36 (ANKRD36), mRNA.	UNQ2430	-1.03725	0.000118672
ELF2	1998	Homo sapiens E74-like factor 2 (ets domain transcription factor) (ELF2), transcript variant 2, mRNA.	NERF; NERF-1A; NERF-2; EU32; NERF-1B; b	-1.03674	1.79859e-05
ZNF786	136051	Homo sapiens zinc finger protein 786 (ZNF786), mRNA.	DKFZp762I137; MGC156120	-1.03613	0.00347468
CDC42BPA	8476	Homo sapiens CDC42 binding protein kinase alpha (DMPK-like) (CDC42BPA), transcript variant B, mRNA.	DKFZp686L1738; PK428; DKFZp686P1738; KIAA0451; FLJ23347; MRCK; MRCKA	-1.03529	3.78044e-06
PRLR	5618	Homo sapiens prolactin receptor (PRLR), mRNA.	hPRLrI	-1.03512	1.841e-06
XRCC2	7516	Homo sapiens X-ray repair complementing defective repair in Chinese hamster cells 2 (XRCC2), mRNA.	DKFZp781P0919	-1.03169	0.0103776
IRAK1BP1	134728	Homo sapiens interleukin-1 receptor-associated kinase 1 binding protein 1 (IRAK1BP1), mRNA.	AIP70; MGC138458; MGC138460; SIMPL	-1.03004	1.38733e-06
LOC650737	650737	PREDICTED: Homo sapiens hypothetical protein LOC650737, transcript variant 1 (LOC650737), mRNA.		-1.02979	0.000140504
GRIPAP1	56850	Homo sapiens GRIP1 associated protein 1 (GRIPAP1), transcript variant 2, mRNA.	DKFZp434P0630; MGC126593; GRASP-1; KIAA1167; MGC126595	-1.02964	0.0107233
SLC35E1	79939	Homo sapiens solute carrier family 35, member E1 (SLC35E1), mRNA.	MGC44954; FLJ14251	-1.02763	0.004027
ZRANB1	54764	Homo sapiens zinc finger, RAN-binding domain containing 1 (ZRANB1), mRNA.	DKFZp762P2216; TRABID	-1.02577	7.24435e-06
PLIN5	440503	Homo sapiens perilipin 5 (PLIN5), mRNA.		-1.02001	0.00275056
ARL16	339231	Homo sapiens ADP-ribosylation factor-like 16 (ARL16), mRNA.		-1.01976	0.0109606
LOC401098	401098	PREDICTED: Homo sapiens misc_RNA (LOC401098), miscRNA.		-1.01808	0.00768795
LOC644250	644250	PREDICTED: Homo sapiens hypothetical protein LOC644250 (LOC644250), mRNA.		-1.01623	0.00243032
DMC1	11144	Homo sapiens DMC1 dosage suppressor of mck1 homolog, meiosis-specific homologous recombination (yeast) (DMC1), mRNA.	DMC1H; HsLim15; dJ199H16.1; MGC150473; MGC150472; LIM15	-1.01616	0.0143762
ICA1	3382	Homo sapiens islet cell autoantigen 1, 69kDa (ICA1), transcript variant 3, mRNA.	ICAp69; ICA69	-1.01467	0.0040463
MARVELD3	91862	Homo sapiens MARVEL domain containing 3 (MARVELD3), transcript variant 2, mRNA.	FLJ32280; MRVLDC3; MARVD3	-1.0138	0.00243032
LOC100128771	100128771	PREDICTED: Homo sapiens misc_RNA (LOC100128771), miscRNA.		-1.01237	2.21936e-05
KIAA1751	85452	Homo sapiens KIAA1751 (KIAA1751), mRNA.	RP1-140A9.6; FLJ45476	-1.01231	0.0217491
CMIP	80790	Homo sapiens c-Maf-inducing protein (CMIP), transcript variant C-mip, mRNA.	KIAA1694	-1.01138	7.70189e-06
MSL3L1	10943	Homo sapiens male-specific lethal 3-like 1 (Drosophila) (MSL3L1), transcript variant 1, mRNA.	DKFZP586J1822	-1.00858	0.00100506
RBM12B	389677	Homo sapiens RNA binding motif protein 12B (RBM12B), mRNA.	MGC:33837	-1.00319	2.64055e-05
HIATL2	84278	Homo sapiens hippocampus abundant transcript-like 2 (HIATL2), non-coding RNA.	FLJ45467; MGC12945	-0.999455	0.0113014
FAM175A	84142	Homo sapiens family with sequence similarity 175, member A (FAM175A), mRNA.	ABRA1; FLJ13614; FLJ12642; FLJ11520	-0.999028	0.0192492
PDE9A	5152	Homo sapiens phosphodiesterase 9A (PDE9A), transcript variant 2, mRNA.	HSPDE9A2	-0.998582	0.0214166
MARCH6	10299	Homo sapiens membrane-associated ring finger (C3HC4) 6 (MARCH6), mRNA.	RNF176; MARCH-VI; TEB4; KIAA0597	-0.998095	0.0153136
FAM73A	374986	Homo sapiens family with sequence similarity 73, member A (FAM73A), mRNA.	FLJ35093; DKFZp686M07166	-0.99387	0.00342055
ACSL3	2181	Homo sapiens acyl-CoA synthetase long-chain family member 3 (ACSL3), transcript variant 1, mRNA.	PRO2194; FACL3; ACS3	-0.99329	0.000112661
LOC730313	730313	PREDICTED: Homo sapiens hypothetical LOC730313 (LOC730313), mRNA.		-0.992123	0.0192492
DDR2	4921	Homo sapiens discoidin domain receptor tyrosine kinase 2 (DDR2), transcript variant 2, mRNA.	TYRO10; TKT; NTRKR3; MIG20a	-0.990174	0.00168501
RAXL1	84839	Homo sapiens retina and anterior neural fold homeobox like 1 (RAXL1), mRNA.	QRX; MGC15631; ARMD6; CORD11	-0.990155	0.00243545
LOC90586	90586	Homo sapiens AOC3 pseudogene (LOC90586), non-coding RNA.		-0.989493	0.0154569
RNU1G2	26864	Homo sapiens RNA, U1G2 small nuclear (RNU1G2), small nuclear RNA.	U1D2; U1B2; HSD5	-0.989476	0.00313498
PTPLAD2	401494	Homo sapiens protein tyrosine phosphatase-like A domain containing 2 (PTPLAD2), mRNA.	DKFZp686F01145; DKFZp686G24132	-0.988186	0.00334194
LRRC37B2	147172	Homo sapiens leucine rich repeat containing 37, member B2 (LRRC37B2), non-coding RNA.	DKFZp667M2411	-0.985976	0.0085575
RNU1F1	26866	Homo sapiens RNA, U1F1 small nuclear (RNU1F1), small nuclear RNA.	U1F; HSD7	-0.984561	0.00126676
LOC100128098	100128098	PREDICTED: Homo sapiens hypothetical protein LOC100128098 (LOC100128098), mRNA.		-0.982205	0.0126781
N4BP2	55728	Homo sapiens Nedd4 binding protein 2 (N4BP2), mRNA.	B3BP; KIAA1413; FLJ10680	-0.979364	0.00475426
LOC100128288	100128288	Homo sapiens hypothetical protein LOC100128288 (LOC100128288), non-coding RNA.		-0.978605	0.0149259
DCBLD1	285761	Homo sapiens discoidin, CUB and LCCL domain containing 1 (DCBLD1), mRNA.	MGC46341; dJ94G16.1; DKFZp686L21135	-0.976657	3.7796e-06
ZNF641	121274	Homo sapiens zinc finger protein 641 (ZNF641), mRNA.	FLJ31295; DKFZp667D1012	-0.976382	5.80852e-05
ZNF486	90649	PREDICTED: Homo sapiens zinc finger protein 486 (ZNF486), mRNA.		-0.976213	0.00584455
EGLN1	54583	Homo sapiens egl nine homolog 1 (C. elegans) (EGLN1), mRNA.	SM20; PHD2; ECYT3; SM-20; HIFPH2; ZMYND6; C1orf12; DKFZp761F179	-0.973787	5.46324e-05
PNPT1	87178	Homo sapiens polyribonucleotide nucleotidyltransferase 1 (PNPT1), mRNA.		-0.973048	0.00527453
LOC646996	646996	Homo sapiens hCG2040201 (LOC646996), non-coding RNA.		-0.968866	0.00243545
IL17RD	54756	Homo sapiens interleukin 17 receptor D (IL17RD), transcript variant 1, mRNA.	MGC133309; FLJ35755; DKFZp434N1928; IL-17RD; SEF; IL17RLM	-0.968621	0.00691288
DUXAP3	503632	Homo sapiens double homeobox A pseudogene 3 (DUXAP3) on chromosome 10.		-0.968572	0.00685724
LOC389765	389765	PREDICTED: Homo sapiens similar to KIF27C (LOC389765), mRNA.		-0.967924	0.00685724
ZNF460	10794	Homo sapiens zinc finger protein 460 (ZNF460), mRNA.	HZF8; ZNF272	-0.966175	2.10507e-05
TMEM106A	113277	Homo sapiens transmembrane protein 106A (TMEM106A), mRNA.	MGC20235	-0.965447	0.00323203
LOC100133019	100133019	PREDICTED: Homo sapiens similar to hCG1983765 (LOC100133019), mRNA.		-0.964997	0.0215351
UBE2Z	65264	PREDICTED: Homo sapiens ubiquitin-conjugating enzyme E2Z (putative), transcript variant 3 (UBE2Z), mRNA.		-0.964098	0.000193669
WDR23	80344	Homo sapiens WD repeat domain 23 (WDR23), transcript variant 1, mRNA.	PRO2389; GL014; DKFZp779A1629	-0.963896	8.64599e-06
BMP2K	55589	Homo sapiens BMP2 inducible kinase (BMP2K), transcript variant 1, mRNA.	DKFZp434P0116; DKFZp434K0614; BIKE; HRIHFB2017	-0.960556	1.07406e-05
CCDC125	202243	Homo sapiens coiled-coil domain containing 125 (CCDC125), mRNA.	KENAE	-0.95957	0.00740545
NBPF14	25832	Homo sapiens neuroblastoma breakpoint family, member 14 (NBPF14), mRNA.	RP3-328E19.1; DJ328E19.C1.1; NBPF; FLJ35032	-0.959445	6.03295e-05
MAP2K4	6416	Homo sapiens mitogen-activated protein kinase kinase 4 (MAP2K4), mRNA.	MEK4; SERK1; MKK4; JNKK; MAPKK4; JNKK1; SEK1; PRKMK4	-0.95811	5.73537e-06
LOC399900	399900	Homo sapiens hypothetical gene supported by AK093779 (LOC399900), mRNA.		-0.957457	0.00505553
NBPF11	728912	Homo sapiens neuroblastoma breakpoint family, member 11 (NBPF11), mRNA.		-0.956062	0.000161803
LOC100129502	100129502	PREDICTED: Homo sapiens hypothetical protein LOC100129502 (LOC100129502), mRNA.		-0.955971	0.00594913
LOC648921	648921	PREDICTED: Homo sapiens similar to LOC283693 protein (LOC648921), mRNA.		-0.955927	0.00294171
FLJ35390	255031	Homo sapiens hypothetical LOC255031 (FLJ35390), transcript variant 1, non-coding RNA.		-0.95011	0.00366754
LOC100133772	100133772	PREDICTED: Homo sapiens similar to MCT (LOC100133772), mRNA.		-0.950037	0.00156315
LOC100131718	100131718	PREDICTED: Homo sapiens misc_RNA (LOC100131718), miscRNA.		-0.949673	0.00584455
HNRPR	10236	Homo sapiens heterogeneous nuclear ribonucleoprotein R (HNRPR), mRNA.	hnRNP-R; FLJ25714; HNRNPR	-0.949375	1.39052e-05
SHROOM4	57477	Homo sapiens shroom family member 4 (SHROOM4), mRNA.	KIAA1202	-0.949163	0.0158487
LEP	3952	Homo sapiens leptin (obesity homolog, mouse) (LEP), mRNA.	OB; OBS	-0.948799	0.00243545
LOC100128510	100128510	PREDICTED: Homo sapiens hypothetical protein LOC100128510 (LOC100128510), mRNA.		-0.946009	0.010648
RARRES1	5918	Homo sapiens retinoic acid receptor responder (tazarotene induced) 1 (RARRES1), transcript variant 2, mRNA.	TIG1	-0.944813	0.00347468
LOC100128084	100128084	PREDICTED: Homo sapiens hypothetical protein LOC100128084 (LOC100128084), mRNA.		-0.944532	0.0103867
NR1D2	9975	PREDICTED: Homo sapiens nuclear receptor subfamily 1, group D, member 2 (NR1D2), mRNA.		-0.943935	0.00220064
LOC729120	729120	PREDICTED: Homo sapiens hypothetical LOC729120 (LOC729120), mRNA.		-0.93872	0.0103776
SRFBP1	153443	Homo sapiens serum response factor binding protein 1 (SRFBP1), mRNA.	P49; FLJ25286; STRAP; p49/STRAP	-0.938553	0.000109311
NUBPL	80224	Homo sapiens nucleotide binding protein-like (NUBPL), mRNA.	FLJ12660; C14orf127	-0.938079	0.00356499
RASEF	158158	Homo sapiens RAS and EF-hand domain containing (RASEF), mRNA.	FLJ31614; RAB45	-0.936505	0.0385083
IVD	3712	Homo sapiens isovaleryl Coenzyme A dehydrogenase (IVD), nuclear gene encoding mitochondrial protein, mRNA.	ACAD2	-0.934827	1.43208e-05
QRFPR	84109	Homo sapiens pyroglutamylated RFamide peptide receptor (QRFPR), mRNA.	SP9155; MGC149217; AQ27	-0.93266	0.0119058
BMS1P5	399761	Homo sapiens BMS1 pseudogene 5 (BMS1P5), non-coding RNA.		-0.932245	0.0222036
LOC100133840	100133840	PREDICTED: Homo sapiens similar to hCG1994151 (LOC100133840), mRNA.		-0.930599	0.0082943
PTPRC	5788	Homo sapiens protein tyrosine phosphatase, receptor type, C (PTPRC), transcript variant 4, mRNA.	LCA; LY5; CD45; T200; B220; GP180	-0.930083	0.00342055
ITGB1	3688	Homo sapiens integrin, beta 1 (fibronectin receptor, beta polypeptide, antigen CD29 includes MDF2, MSK12) (ITGB1), transcript variant 1D, mRNA.	GPIIA; VLAB; MDF2; FNRB; CD29; MSK12	-0.929858	0.00173978
SDHALP1	255812	Homo sapiens succinate dehydrogenase complex, subunit A, flavoprotein pseudogene 1 (SDHALP1) on chromosome 3.	SDHAL1	-0.92945	0.00461369
PROX1	5629	Homo sapiens prospero homeobox 1 (PROX1), mRNA.		-0.927229	0.000158644
LOC100133516	100133516	PREDICTED: Homo sapiens hypothetical protein LOC100133516 (LOC100133516), mRNA.		-0.926853	0.00778058
LBR	3930	Homo sapiens lamin B receptor (LBR), transcript variant 1, mRNA.	PHA; MGC9041; LMN2R; DHCR14B	-0.925154	0.00193503
HNRNPU	3192	Homo sapiens heterogeneous nuclear ribonucleoprotein U (scaffold attachment factor A) (HNRNPU), transcript variant 2, mRNA.	SAF-A; HNRPU; U21.1; HNRNPU	-0.923932	0.00642128
ZNF738	148203	PREDICTED: Homo sapiens misc_RNA (ZNF738), partial miscRNA.		-0.922964	0.0132063
GMCL1	64395	Homo sapiens germ cell-less homolog 1 (Drosophila) (GMCL1), mRNA.	GCL1; BTBD13; GCL	-0.922828	0.000539461
USF1	7391	Homo sapiens upstream transcription factor 1 (USF1), transcript variant 2, mRNA.	HYPLIP1; FCHL1; MLTF; FCHL; UEF; MLTFI	-0.919435	0.000684308
USP33	23032	Homo sapiens ubiquitin specific peptidase 33 (USP33), transcript variant 2, mRNA.	MGC16868; KIAA1097; VDU1	-0.917897	0.00100545
LOC100130053	100130053	PREDICTED: Homo sapiens hypothetical protein LOC100130053 (LOC100130053), mRNA.		-0.917412	0.00526828
HCG2P7	80867	Homo sapiens HLA complex group 2 pseudogene 7 (HCG2P7), non-coding RNA.	HCGII-7; HCGII.2	-0.916597	0.00896481
C14orf153	84334	Homo sapiens chromosome 14 open reading frame 153 (C14orf153), mRNA.	Apop-1; MGC2562; APOP1	-0.915542	0.0169803
CRCP	27297	Homo sapiens CGRP receptor component (CRCP), transcript variant 1, mRNA.	MGC111194; CGRP-RCP; RCP; CRCP	-0.915128	0.00505553
ZRANB2	9406	Homo sapiens zinc finger, RAN-binding domain containing 2 (ZRANB2), transcript variant 2, mRNA.	DKFZp686J1831; DKFZp686N09117; ZIS2; ZIS1; FLJ41119; ZIS; ZNF265	-0.914639	0.000680586
IKZF3	22806	Homo sapiens IKAROS family zinc finger 3 (Aiolos) (IKZF3), transcript variant 1, mRNA.	AIOLOS; ZNFN1A3	-0.914221	0.00119309
CATSPER2	117155	Homo sapiens cation channel, sperm associated 2 (CATSPER2), transcript variant 4, mRNA.	MGC33346	-0.912539	0.0201252
C21orf24	400866	Homo sapiens chromosome 21 open reading frame 24 (C21orf24), mRNA.		-0.907168	0.0053163
CDKN2AIPNL	91368	Homo sapiens CDKN2A interacting protein N-terminal like (CDKN2AIPNL), mRNA.	MGC13017	-0.905217	0.0289792
CHRNA5	1138	Homo sapiens cholinergic receptor, nicotinic, alpha 5 (CHRNA5), mRNA.		-0.90393	0.0180694
LMOD3	56203	Homo sapiens leiomodin 3 (fetal) (LMOD3), mRNA.	DKFZp313F0135	-0.903531	0.021886
RNU1-3	26869	Homo sapiens RNA, U1 small nuclear 3 (RNU1-3), small nuclear RNA.	U1C21	-0.901119	0.00413453
YTHDC1	91746	Homo sapiens YTH domain containing 1 (YTHDC1), transcript variant 1, mRNA.	YT521-B; YT521; KIAA1966	-0.8999	2.10869e-05
LOC728873	728873	PREDICTED: Homo sapiens misc_RNA (LOC728873), miscRNA.		-0.899746	0.000426019
CEP27	55142	Homo sapiens centrosomal protein 27kDa (CEP27), mRNA.	FLJ10460; C15orf25; HsT17025	-0.898829	0.00505553
CAST	831	Homo sapiens calpastatin (CAST), transcript variant 9, mRNA.	MGC9402; BS-17	-0.898353	5.50205e-06
LOC729090	729090	PREDICTED: Homo sapiens similar to Eukaryotic translation elongation factor 1 alpha 1 (LOC729090), mRNA.		-0.895116	0.0108099
EZH2	2146	Homo sapiens enhancer of zeste homolog 2 (Drosophila) (EZH2), transcript variant 1, mRNA.	EZH1; ENX-1; MGC9169; KMT6	-0.894695	3.09024e-05
PPA2	27068	Homo sapiens pyrophosphatase (inorganic) 2 (PPA2), nuclear gene encoding mitochondrial protein, transcript variant 2, mRNA.	HSPC124; FLJ20459; MGC49850; SID6-306	-0.887232	0.0082943
MSL3	10943	Homo sapiens male-specific lethal 3 homolog (Drosophila) (MSL3), transcript variant 1, mRNA.		-0.8872	0.000465839
ZNF326	284695	Homo sapiens zinc finger protein 326 (ZNF326), transcript variant 1, mRNA.	FLJ20403; dJ871E2.1; ZAN75; Zfp326; MGC61591	-0.887076	0.000157332
KCNH6	81033	Homo sapiens potassium voltage-gated channel, subfamily H (eag-related), member 6 (KCNH6), transcript variant 1, mRNA.	HERG2; ERG2; Kv11.2	-0.886394	0.0141046
HSD17B7	51478	Homo sapiens hydroxysteroid (17-beta) dehydrogenase 7 (HSD17B7), mRNA.	MGC12523; MGC75018; PRAP	-0.886095	0.00724316
LOC100134868	100134868	Homo sapiens hypothetical LOC100134868 (LOC100134868), non-coding RNA.		-0.8854	0.00827233
SBDSP	155370	Homo sapiens Shwachman-Bodian-Diamond syndrome pseudogene (SBDSP) on chromosome 7.		-0.882943	0.000226918
GSDMB	55876	Homo sapiens gasdermin B (GSDMB), transcript variant 2, mRNA.	PRO2521; PP4052	-0.882057	0.000618407
MXI1	4601	Homo sapiens MAX interactor 1 (MXI1), transcript variant 2, mRNA.	MAD2; MGC43220; MXI; MXD2	-0.881522	0.00174154
ZNF549	256051	Homo sapiens zinc finger protein 549 (ZNF549), mRNA.	FLJ34917	-0.879879	0.0195344
TRIM5	85363	Homo sapiens tripartite motif-containing 5 (TRIM5), transcript variant delta, mRNA.	RNF88; TRIM5alpha	-0.877094	0.000219124
LOC100129211	100129211	PREDICTED: Homo sapiens hypothetical protein LOC100129211 (LOC100129211), mRNA.		-0.872616	0.0206388
DEM1	64789	Homo sapiens defects in morphology 1 homolog (S. cerevisiae) (DEM1), mRNA.	FLJ21144; FLJ13183; FLJ11445	-0.870786	0.0203339
LIMS1	3987	Homo sapiens LIM and senescent cell antigen-like domains 1 (LIMS1), mRNA.	PINCH; PINCH1	-0.86995	0.000190967
LOC728903	728903	PREDICTED: Homo sapiens hypothetical LOC728903, transcript variant 1 (LOC728903), mRNA.		-0.869649	0.0270267
LOC100134159	100134159	PREDICTED: Homo sapiens similar to Coiled-coil domain containing 144B (LOC100134159), mRNA.		-0.868436	0.00278271
ANKRD30B	374860	Homo sapiens ankyrin repeat domain 30B (ANKRD30B), mRNA.	NY-BR-1.1	-0.867479	0.004027
LOC100132727	100132727	PREDICTED: Homo sapiens hypothetical protein LOC100132727 (LOC100132727), mRNA.		-0.863917	0.00827233
SPTLC1	10558	Homo sapiens serine palmitoyltransferase, long chain base subunit 1 (SPTLC1), transcript variant 2, mRNA.	HSAN; HSAN1; SPT1; HSN1; MGC14645; LBC1; SPTI; LCB1	-0.861178	0.00827233
ADD3	120	Homo sapiens adducin 3 (gamma) (ADD3), transcript variant 1, mRNA.	ADDL	-0.859783	0.0165233
LOC100133923	100133923	PREDICTED: Homo sapiens hypothetical protein LOC100133923 (LOC100133923), mRNA.		-0.856965	0.00814571
LOC728755	728755	PREDICTED: Homo sapiens similar to hCG1984907 (LOC728755), mRNA.		-0.856022	0.000975261
HSPC268	154791	Homo sapiens hypothetical protein HSPC268 (HSPC268), mRNA.		-0.854203	0.0207428
PDCL	5082	Homo sapiens phosducin-like (PDCL), mRNA.	PhLP; DKFZp564M1863	-0.851685	3.11999e-05
DCLRE1C	64421	Homo sapiens DNA cross-link repair 1C (PSO2 homolog, S. cerevisiae) (DCLRE1C), transcript variant b, mRNA.	SCIDA; DCLREC1C; SNM1C; FLJ36438; RS-SCID; FLJ11360; A-SCID	-0.848792	0.00192365
C9orf80	58493	Homo sapiens chromosome 9 open reading frame 80 (C9orf80), mRNA.	HSPC043; RP11-276E15.2	-0.847766	0.00641191
ATRX	546	Homo sapiens alpha thalassemia/mental retardation syndrome X-linked (RAD54 homolog, S. cerevisiae) (ATRX), transcript variant 1, mRNA.	XNP; ZNF-HX; MRXHF1; XH2; ATR2; SFM1; SHS; MRXS3; RAD54L; RAD54; MGC2094	-0.846715	0.000121174
SMCR5	140771	Homo sapiens Smith-Magenis syndrome chromosome region, candidate 5 (non-protein coding) (SMCR5), non-coding RNA.		-0.846507	0.00120401
C3orf34	84984	Homo sapiens chromosome 3 open reading frame 34 (C3orf34), mRNA.	MGC14126	-0.842028	0.0234838
SLC4A5	57835	Homo sapiens solute carrier family 4, sodium bicarbonate cotransporter, member 5 (SLC4A5), transcript variant c, mRNA.	NBC4; MGC129662	-0.838013	0.00868625
C5orf28	64417	Homo sapiens chromosome 5 open reading frame 28 (C5orf28), mRNA.	MGC90226; MGC149524; FLJ21657	-0.837569	0.0217491
SMAD9	4093	Homo sapiens SMAD family member 9 (SMAD9), mRNA.	SMAD8B; MADH9; MADH6; SMAD8A	-0.837483	0.000103778
LSM12	124801	Homo sapiens LSM12 homolog (S. cerevisiae) (LSM12), mRNA.	PNAS-135; FLJ30656; MGC104211	-0.833216	0.000415642
B4GALT1	2683	Homo sapiens UDP-Gal:betaGlcNAc beta 1,4- galactosyltransferase, polypeptide 1 (B4GALT1), mRNA.	MGC50983; GT1; beta4Gal-T1; GTB; B4GAL-T1; GGTB2; DKFZp686N19253	-0.832206	0.00226523
USP1	7398	Homo sapiens ubiquitin specific peptidase 1 (USP1), transcript variant 1, mRNA.	UBP	-0.83216	0.000463268
ABLIM1	3983	Homo sapiens actin binding LIM protein 1 (ABLIM1), transcript variant 4, mRNA.	KIAA0059; FLJ14564; MGC1224; LIMATIN; LIMAB1; DKFZp781D0148; ABLIM	-0.83139	3.15895e-05
MBD4	8930	Homo sapiens methyl-CpG binding domain protein 4 (MBD4), mRNA.	MED1	-0.828448	0.00608408
C8orf37	157657	Homo sapiens chromosome 8 open reading frame 37 (C8orf37), mRNA.	FLJ30600	-0.827505	0.00665507
PTP4A2	8073	PREDICTED: Homo sapiens protein tyrosine phosphatase type IVA, member 2, transcript variant 5 (PTP4A2), mRNA.		-0.827402	0.00243545
YRDC	79693	Homo sapiens yrdC domain containing (E. coli) (YRDC), nuclear gene encoding mitochondrial protein, mRNA.	FLJ23476; IRIP; FLJ26165; RP11-109P14.4; SUA5; DRIP3	-0.824418	0.00909878
CAMK2D	817	Homo sapiens calcium/calmodulin-dependent protein kinase (CaM kinase) II delta (CAMK2D), transcript variant 3, mRNA.	MGC44911; CAMKD	-0.824376	0.000693102
ZNF223	7766	Homo sapiens zinc finger protein 223 (ZNF223), mRNA.		-0.824224	0.0055064
LOC100130764	100130764	PREDICTED: Homo sapiens p150-like (LOC100130764), mRNA.		-0.820887	0.000913124
DCUN1D1	54165	Homo sapiens DCN1, defective in cullin neddylation 1, domain containing 1 (S. cerevisiae) (DCUN1D1), mRNA.	SCRO; RP42; DCUN1L1; Tes3	-0.819467	0.00081957
LOC100190938	100190938	Homo sapiens hypothetical LOC100190938 (LOC100190938), transcript variant 2, non-coding RNA.		-0.815808	0.0143177
M6PR	4074	Homo sapiens mannose-6-phosphate receptor (cation dependent) (M6PR), mRNA.	SMPR; FLJ32994; CD-MPR; MPR46	-0.812668	0.00121108
POFUT1	23509	Homo sapiens protein O-fucosyltransferase 1 (POFUT1), transcript variant 1, mRNA.	O-Fuc-T; O-FUT; FUT12; O-FucT-1; MGC2482; KIAA0180	-0.811424	0.0174344
MIR21	406991	Homo sapiens microRNA 21 (MIR21), microRNA.		-0.809673	0.00509845
HMGB1L1	10357	Homo sapiens high-mobility group box 1-like 1 (HMGB1L1), mRNA.	HMG1L7; dJ579F20.1	-0.808382	0.000523772
SEMA3E	9723	Homo sapiens sema domain, immunoglobulin domain (Ig), short basic domain, secreted, (semaphorin) 3E (SEMA3E), mRNA.	SEMAH; coll-5; M-SEMAH; M-sema H; M-SemaK; KIAA0331	-0.806368	0.0257174
LOC730990	730990	PREDICTED: Homo sapiens hypothetical LOC730990 (LOC730990), mRNA.		-0.802823	0.00945872
EIF2AK4	440275	Homo sapiens eukaryotic translation initiation factor 2 alpha kinase 4 (EIF2AK4), mRNA.	GCN2; KIAA1338	-0.801526	0.00234789
IL6ST	3572	Homo sapiens interleukin 6 signal transducer (gp130, oncostatin M receptor) (IL6ST), transcript variant 1, mRNA.	GP130; CD130; IL6R-beta; CDw130; GP130-RAPS	-0.801471	0.00304316
FAM119A	151194	Homo sapiens family with sequence similarity 119, member A (FAM119A), mRNA.	MGC45373	-0.800681	0.0281552
FLJ40722	285966	PREDICTED: Homo sapiens hypothetical protein FLJ40722, transcript variant 3 (FLJ40722), mRNA.		-0.799117	0.0147294
TCF7L2	6934	Homo sapiens transcription factor 7-like 2 (T-cell specific, HMG-box) (TCF7L2), mRNA.	TCF-4; TCF4	-0.797675	0.00192965
DAPP1	27071	Homo sapiens dual adaptor of phosphotyrosine and 3-phosphoinositides (DAPP1), mRNA.	DKFZp667E0716; BAM32	-0.796143	0.00505553
LOC441268	441268	Homo sapiens hypothetical gene supported by BC044942 (LOC441268), mRNA.		-0.793629	0.0100445
HNRNPL	3191	Homo sapiens heterogeneous nuclear ribonucleoprotein L (HNRNPL), transcript variant 2, mRNA.	P/OKcl.14; FLJ35509; hnRNP-L; HNRPL	-0.793268	0.0197246
DUSP19	142679	Homo sapiens dual specificity phosphatase 19 (DUSP19), mRNA.	MGC138210; SKRP1; DUSP17; TS-DSP1	-0.792773	0.0281552
EID2B	126272	Homo sapiens EP300 interacting inhibitor of differentiation 2B (EID2B), mRNA.	EID-3; FLJ38944	-0.791802	0.035078
LOC653489	653489	PREDICTED: Homo sapiens similar to Ran-binding protein 2 (RanBP2) (Nuclear pore complex protein Nup358) (Nucleoporin Nup358) (358 kDa nucleoporin) (P270), transcript variant 7 (LOC653489), mRNA.		-0.79113	0.0085575
SP100	6672	Homo sapiens SP100 nuclear antigen (SP100), transcript variant 1, mRNA.	DKFZp686E07254; FLJ00340; FLJ34579	-0.790508	0.000186524
LRAP	64167	Homo sapiens leukocyte-derived arginine aminopeptidase (LRAP), mRNA.	FLJ23633; FLJ23807; FLJ23701; L-RAP; ERAP2	-0.785158	0.029813
FAM40B	57464	Homo sapiens family with sequence similarity 40, member B (FAM40B), mRNA.		-0.784585	0.00262118
TES	26136	Homo sapiens testis derived transcript (3 LIM domains) (TES), transcript variant 1, mRNA.	DKFZP586B2022; TESS-2; MGC1146; TESTIN; TESS	-0.783888	0.000338715
LOC650128	650128	PREDICTED: Homo sapiens similar to CG1486-PA, isoform A, transcript variant 4 (LOC650128), mRNA.		-0.777298	0.00627543
MGC26356	642280	PREDICTED: Homo sapiens misc_RNA (MGC26356), miscRNA.		-0.773155	0.00673793
LOC392437	392437	PREDICTED: Homo sapiens misc_RNA (LOC392437), miscRNA.		-0.772103	0.0158
LOC100129269	100129269	PREDICTED: Homo sapiens hypothetical protein LOC100129269 (LOC100129269), mRNA.		-0.768535	0.0177588
RASSF6	166824	Homo sapiens Ras association (RalGDS/AF-6) domain family member 6 (RASSF6), transcript variant 1, mRNA.	DKFZp686K23225	-0.768251	0.000663628
TOB1	10140	Homo sapiens transducer of ERBB2, 1 (TOB1), mRNA.	MGC104792; TROB; APRO6; TROB1; PIG49; TOB; MGC34446	-0.768223	0.00060814
C14orf85	319085	Homo sapiens chromosome 14 open reading frame 85 (C14orf85), non-coding RNA.		-0.766002	0.0366813
TNFSF14	8740	Homo sapiens tumor necrosis factor (ligand) superfamily, member 14 (TNFSF14), transcript variant 2, mRNA.	LTg; CD258; LIGHT; HVEML; TR2	-0.765833	0.0100158
LOC648852	648852	PREDICTED: Homo sapiens hypothetical protein LOC648852 (LOC648852), mRNA.		-0.764031	0.0239187
CPT1A	1374	Homo sapiens carnitine palmitoyltransferase 1A (liver) (CPT1A), nuclear gene encoding mitochondrial protein, transcript variant 2, mRNA.	CPT1-L; L-CPT1; CPT1	-0.762437	0.00642128
FCAR	2204	Homo sapiens Fc fragment of IgA, receptor for (FCAR), transcript variant 9, mRNA.	CD89	-0.759813	0.0135335
LOC401321	401321	PREDICTED: Homo sapiens hypothetical LOC401321 (LOC401321), mRNA.		-0.754595	0.00291585
LOC653086	653086	PREDICTED: Homo sapiens similar to RAN-binding protein 2-like 1 isoform 2, transcript variant 10 (LOC653086), mRNA.		-0.749854	0.0119058
LOC100130516	100130516	PREDICTED: Homo sapiens hypothetical protein LOC100130516 (LOC100130516), mRNA.		-0.749354	0.0293273
FRMD3	257019	Homo sapiens FERM domain containing 3 (FRMD3), mRNA.	MGC20553; EPB41L4O; P410; 4.1O; RP11-439K3.2	-0.747934	0.0112635
TDP1	55775	Homo sapiens tyrosyl-DNA phosphodiesterase 1 (TDP1), transcript variant 1, mRNA.	FLJ11090; MGC104252	-0.747743	0.0247264
WWOX	51741	Homo sapiens WW domain containing oxidoreductase (WWOX), transcript variant 3, mRNA.	FOR; HHCMA56; FRA16D; WWOX v8; WOX1; D16S432E; PRO0128	-0.747521	0.000347088
LAMB1	3912	Homo sapiens laminin, beta 1 (LAMB1), mRNA.	MGC142015; CLM	-0.74713	0.000344797
PLA2G2D	26279	Homo sapiens phospholipase A2, group IID (PLA2G2D), mRNA.	SPLASH; sPLA2S	-0.74235	0.00579489
LOC646463	646463	PREDICTED: Homo sapiens similar to Ubiquitin-conjugating enzyme E2 H (Ubiquitin-protein ligase H) (Ubiquitin carrier protein H) (UBCH2) (E2-20K) (LOC646463), mRNA.		-0.742332	6.96643e-05
POLR2J4	84820	Homo sapiens polymerase (RNA) II (DNA directed) polypeptide J, 13.3kDa pseudogene (POLR2J4) on chromosome 7.	RPB11-phi; MGC13098	-0.740571	0.00121882
FAM13A	10144	Homo sapiens family with sequence similarity 13, member A (FAM13A), transcript variant 2, mRNA.	FLJ34562; MGC105131	-0.740259	0.000357164
LOC100130561	100130561	PREDICTED: Homo sapiens similar to high-mobility group (nonhistone chromosomal) protein 1-like 10, transcript variant 2 (LOC100130561), mRNA.		-0.739884	0.0211433
BCYRN1	618	Homo sapiens brain cytoplasmic RNA 1 (non-protein coding) (BCYRN1), non-coding RNA.	BC200a; BC200	-0.738854	0.0127146
LOC651441	651441	PREDICTED: Homo sapiens similar to Fc fragment of IgG binding protein (LOC651441), mRNA.		-0.733533	0.0338883
C18orf19	125228	Homo sapiens chromosome 18 open reading frame 19 (C18orf19), mRNA.	HsT2329; MGC24180	-0.732748	0.00019241
LOC643336	643336	PREDICTED: Homo sapiens similar to hCG1985303 (LOC643336), mRNA.		-0.728163	0.0131466
PTPLAD1	51495	Homo sapiens protein tyrosine phosphatase-like A domain containing 1 (PTPLAD1), mRNA.	B-IND1; HSPC121; FLJ90376	-0.728136	0.0201252
CDC42	998	Homo sapiens cell division cycle 42 (GTP binding protein, 25kDa) (CDC42), transcript variant 3, mRNA.	CDC42Hs; G25K	-0.727491	0.0191366
UGP2	7360	Homo sapiens UDP-glucose pyrophosphorylase 2 (UGP2), transcript variant 1, mRNA.	UGPP2; pHC379; UDPG; UDPGP2	-0.723584	0.0435289
LOC730993	730993	PREDICTED: Homo sapiens misc_RNA (LOC730993), miscRNA.		-0.718043	0.00427632
SON	6651	Homo sapiens SON DNA binding protein (SON), transcript variant f, mRNA.	FLJ21099; SON3; KIAA1019; BASS1; NREBP; C21orf50; DBP-5; FLJ33914	-0.71793	0.00606259
SORBS1	10580	Homo sapiens sorbin and SH3 domain containing 1 (SORBS1), transcript variant 3, mRNA.	R85FL; DKFZp451C066; SH3P12; DKFZp586P1422; KIAA1296; SORB1; FLJ12406; SH3D5; FLAF2; CAP	-0.704808	0.00668365
LOC441087	441087	Homo sapiens hypothetical gene supported by AK125735 (LOC441087), mRNA.		-0.704427	0.0289792
LOC100128505	100128505	PREDICTED: Homo sapiens similar to hCG2021201 (LOC100128505), mRNA.		-0.702685	0.0262626
GTF2IP1	2970	Homo sapiens general transcription factor II, i, pseudogene 1 (GTF2IP1) on chromosome 7.	WBSCR7	-0.695064	0.00111871
SEPT6	23157	Homo sapiens septin 6 (SEPT6), transcript variant III, mRNA.	SEP2; RP5-876A24.2; MGC16619; SEPT2; MGC20339; KIAA0128	-0.691106	0.00880956
LOC649553	649553	PREDICTED: Homo sapiens misc_RNA (LOC649553), miscRNA.		-0.689597	0.01374
STAG3L3	442578	Homo sapiens stromal antigen 3-like 3 (STAG3L3), mRNA.		-0.686717	0.0281552
LOC651143	651143	PREDICTED: Homo sapiens hypothetical protein LOC651143, transcript variant 1 (LOC651143), mRNA.		-0.682243	0.00243032
UGT8	7368	Homo sapiens UDP glycosyltransferase 8 (UDP-galactose ceramide galactosyltransferase) (UGT8), mRNA.	CGT	-0.681557	0.00236563
LOC100190986	100190986	Homo sapiens hypothetical LOC100190986 (LOC100190986), non-coding RNA.		-0.672433	0.0263792
MYO3B	140469	Homo sapiens myosin IIIB (MYO3B), mRNA.		-0.671571	0.0262471
CREB1	1385	Homo sapiens cAMP responsive element binding protein 1 (CREB1), transcript variant A, mRNA.	MGC9284; CREB	-0.668688	0.0283952
CEPT1	10390	Homo sapiens choline/ethanolamine phosphotransferase 1 (CEPT1), transcript variant 1, mRNA.	MGC45223; DKFZp313G0615	-0.668056	0.00326072
STAG3L2	442582	Homo sapiens stromal antigen 3-like 2 (STAG3L2), mRNA.	MGC131759	-0.66737	0.0158
ANKRD20A1	84210	Homo sapiens ankyrin repeat domain 20 family, member A1 (ANKRD20A1), mRNA.	ANKRD20A; DKFZp434A171	-0.661044	0.0328022
CYCSL1	157317	Homo sapiens cytochrome c, somatic-like 1 (CYCSL1) on chromosome 6.	HS11; bA513I15.3; HCP15	-0.660256	0.00874977
KLHL28	54813	Homo sapiens kelch-like 28 (Drosophila) (KLHL28), mRNA.	FLJ20081; BTBD5	-0.659209	0.0139819
LOC400446	400446	PREDICTED: Homo sapiens misc_RNA (LOC400446), miscRNA.		-0.658449	0.0132125
GPR1	2825	Homo sapiens G protein-coupled receptor 1 (GPR1), mRNA.		-0.657606	0.025564
LOC644852	644852	PREDICTED: Homo sapiens hypothetical protein LOC644852, transcript variant 2 (LOC644852), mRNA.		-0.65749	0.0152639
CXorf38	159013	Homo sapiens chromosome X open reading frame 38 (CXorf38), mRNA.	MGC39350	-0.652133	0.00047849
TMEM191A	84222	PREDICTED: Homo sapiens misc_RNA (TMEM191A), miscRNA.		-0.651539	0.0063442
ZMAT3	64393	Homo sapiens zinc finger, matrin type 3 (ZMAT3), transcript variant 2, mRNA.	PAG608; WIG1; FLJ12296; WIG-1; MGC10613	-0.643056	0.0426542
LOC23117	23117	PREDICTED: Homo sapiens KIAA0220-like protein, transcript variant 16 (LOC23117), mRNA.		-0.642032	0.0147505
HSPA1A	3303	Homo sapiens heat shock 70kDa protein 1A (HSPA1A), mRNA.	HSPA1; HSP70-1; HSPA1B; HSP72	-0.63742	0.0258113
HDLBP	3069	Homo sapiens high density lipoprotein binding protein (HDLBP), transcript variant 1, mRNA.	HBP; VGL; FLJ16432; PRO2900	-0.629101	0.0053163
LOC100130835	100130835	PREDICTED: Homo sapiens misc_RNA (LOC100130835), miscRNA.		-0.626133	0.0256083
CUTL1	1523	Homo sapiens cut-like 1, CCAAT displacement protein (Drosophila) (CUTL1), transcript variant 1, mRNA.	p110; CASP; CUX; Nbla10317; p75; COY1; p200; p100; CDP	-0.619391	0.0085575
PSMD12	5718	PREDICTED: Homo sapiens proteasome (prosome, macropain) 26S subunit, non-ATPase, 12 (PSMD12), mRNA.		-0.618571	0.0367865
CPEB4	80315	Homo sapiens cytoplasmic polyadenylation element binding protein 4 (CPEB4), mRNA.	KIAA1673	-0.617375	0.00552969
ZC3HAV1	56829	Homo sapiens zinc finger CCCH-type, antiviral 1 (ZC3HAV1), transcript variant 1, mRNA.	FLJ13288; ZC3HDC2; FLB6421; ZAP; DKFZp686H1869; DKFZp686O19171; MGC48898; DKFZp686F2052; ZC3H2	-0.612929	0.0107034
LOC653158	653158	PREDICTED: Homo sapiens similar to hypothetical protein MGC40405, transcript variant 1 (LOC653158), mRNA.		-0.610437	0.0130506
ALG11	440138	Homo sapiens asparagine-linked glycosylation 11, alpha-1,2-mannosyltransferase homolog (yeast) (ALG11), mRNA.	KIAA0266; GT8	-0.609166	0.0253672
SNAPC1	6617	Homo sapiens small nuclear RNA activating complex, polypeptide 1, 43kDa (SNAPC1), mRNA.	SNAP43; PTFgamma	-0.607586	0.00740545
C6orf170	221322	Homo sapiens chromosome 6 open reading frame 170 (C6orf170), mRNA.	bA301B7.2; FLJ30899; C6orf171; FLJ34235; bA57L9.1; dJ310J6.1	-0.604161	0.00896481
HSPA1B	3304	Homo sapiens heat shock 70kDa protein 1B (HSPA1B), mRNA.	HSP70-2; HSPA1A	-0.603815	0.0404625
AMD1	262	Homo sapiens adenosylmethionine decarboxylase 1 (AMD1), transcript variant 1, mRNA.	ADOMETDC; AMD; DKFZp313L1234; FLJ26964	-0.602588	0.0272395
PSMC1	5700	Homo sapiens proteasome (prosome, macropain) 26S subunit, ATPase, 1 (PSMC1), mRNA.	P26S4; p56; MGC24583; S4; MGC8541	-0.60243	0.0426542
MGC29506	51237	Homo sapiens hypothetical protein MGC29506 (MGC29506), mRNA.	FLJ32987; PACAP	-0.602084	0.0102556
LOC731542	731542	PREDICTED: Homo sapiens misc_RNA (LOC731542), miscRNA.		-0.601802	0.0259781
LOC730996	730996	PREDICTED: Homo sapiens similar to chromosome 1 open reading frame 80 (LOC730996), mRNA.		-0.600033	0.00527453
ACADM	34	Homo sapiens acyl-Coenzyme A dehydrogenase, C-4 to C-12 straight chain (ACADM), nuclear gene encoding mitochondrial protein, mRNA.	MCADH; ACAD1; MCAD	-0.597745	0.00633956
RBPJ	3516	Homo sapiens recombination signal binding protein for immunoglobulin kappa J region (RBPJ), transcript variant 4, mRNA.	SUH; RBP-J; RBPJK; csl; KBF2; IGKJRB1; IGKJRB; CBF1; RBPSUH; MGC61669	-0.593608	0.0317198
LOC729978	729978	PREDICTED: Homo sapiens similar to LOC339047 protein, transcript variant 2 (LOC729978), mRNA.		-0.592302	0.0174586
PTGR2	145482	Homo sapiens prostaglandin reductase 2 (PTGR2), mRNA.	FLJ39091; PGR-2; PGR2; DKFZp686P10120	-0.59171	0.0149966
TDRD1	56165	Homo sapiens tudor domain containing 1 (TDRD1), mRNA.	FLJ21082	-0.590767	0.029513
LOC100133607	100133607	PREDICTED: Homo sapiens hypothetical protein LOC100133607, transcript variant 2 (LOC100133607), mRNA.		-0.590719	0.0356486
IKZF1	10320	Homo sapiens IKAROS family zinc finger 1 (Ikaros) (IKZF1), mRNA.	Hs.54452; IK1; PRO0758; hIk-1; IKAROS; LYF1; ZNFN1A1	-0.590545	0.035078
SLC26A2	1836	Homo sapiens solute carrier family 26 (sulfate transporter), member 2 (SLC26A2), mRNA.	DTDST; MSTP157; MST153; D5S1708; DTD; EDM4	-0.585926	0.0356095
B3Gn-T6	192134	Homo sapiens beta-1,3-N-acetylglucosaminyltransferase protein (B3Gn-T6), mRNA.	MGC119336; IMAGE:4907098; MGC119337; MGC119334	-0.584161	0.0365592
MUC1	4582	Homo sapiens mucin 1, cell surface associated (MUC1), transcript variant 1, mRNA.	PEMT; PUM; PEM; EMA; H23AG; MAM6; CD227	-0.583099	0.0332962
LOC644695	644695	PREDICTED: Homo sapiens hypothetical LOC644695 (LOC644695), mRNA.		-0.581714	0.017212
GPR120	338557	Homo sapiens G protein-coupled receptor 120 (GPR120), mRNA.	GT01; GPR129; MGC119984; PGR4	-0.580851	0.0428511
LOC643300	643300	PREDICTED: Homo sapiens similar to 60 kDa heat shock protein, mitochondrial precursor (Hsp60) (60 kDa chaperonin) (CPN60) (Heat shock protein 60) (HSP-60) (Mitochondrial matrix protein P1) (P60 lymphocyte protein) (HuCHA60) (LOC643300), mRNA.		-0.579769	0.0240718
NFIX	4784	Homo sapiens nuclear factor I/X (CCAAT-binding transcription factor) (NFIX), mRNA.	NF1A	-0.579449	0.0107233
TNFSF15	9966	Homo sapiens tumor necrosis factor (ligand) superfamily, member 15 (TNFSF15), mRNA.	TL1; TL1A; MGC129934; VEGI; VEGI192A; MGC129935	-0.576279	0.0219779
FAM63A	55793	Homo sapiens family with sequence similarity 63, member A (FAM63A), transcript variant 1, mRNA.	RP11-316M1.5; FLJ43504; FLJ11280	-0.575664	0.0251291
TFPI	7035	Homo sapiens tissue factor pathway inhibitor (lipoprotein-associated coagulation inhibitor) (TFPI), transcript variant 1, mRNA.	TFI; LACI; EPI	-0.568364	0.00198296
FGL2	10875	Homo sapiens fibrinogen-like 2 (FGL2), mRNA.	pT49; T49	-0.567905	0.00896481
MUPCDH	53841	Homo sapiens mucin-like protocadherin (MUPCDH), transcript variant 1, mRNA.	MU-PCDH; FLJ20219; MUCDHL	-0.567123	0.0206512
CHGA	1113	Homo sapiens chromogranin A (parathyroid secretory protein 1) (CHGA), mRNA.	CGA	-0.562883	0.0369914
SSTR2	6752	Homo sapiens somatostatin receptor 2 (SSTR2), mRNA.		-0.561288	0.0257174
LOC285016	285016	Homo sapiens hypothetical protein LOC285016 (LOC285016), mRNA.	RGPG542; PRO1097	-0.554803	0.00844921
LOC613037	613037	Homo sapiens nuclear pore complex interacting protein pseudogene (LOC613037), non-coding RNA.		-0.552901	0.02464
TPM1	7168	Homo sapiens tropomyosin 1 (alpha) (TPM1), transcript variant 6, mRNA.	TPM1-alpha; HTM-alpha; TPM1-kappa; TMSA; C15orf13	-0.549715	0.0375992
EDN1	1906	Homo sapiens endothelin 1 (EDN1), mRNA.	ET1	-0.549197	0.0430525
H2AFY	9555	Homo sapiens H2A histone family, member Y (H2AFY), transcript variant 1, mRNA.	H2A.y; H2A/y; H2AF12M; MACROH2A1.1; mH2A1; macroH2A1.2; H2AFJ	-0.547332	0.00480922
C11orf63	79864	Homo sapiens chromosome 11 open reading frame 63 (C11orf63), transcript variant 2, mRNA.	FLJ23554	-0.546735	0.0330051
EIF5A	1984	Homo sapiens eukaryotic translation initiation factor 5A (EIF5A), mRNA.	MGC104255; EIF-5A; uORF A; uORF; MGC99547; EIF5A1	-0.542372	0.0125439
EDN3	1908	Homo sapiens endothelin 3 (EDN3), transcript variant 3, mRNA.	MGC61498; MGC15067; ET3	-0.540915	0.0210779
ZNF577	84765	Homo sapiens zinc finger protein 577 (ZNF577), mRNA.	MGC4400	-0.539179	0.0441673
WSB1	26118	Homo sapiens WD repeat and SOCS box-containing 1 (WSB1), transcript variant 2, mRNA.	WSB-1; SWIP1	-0.538116	0.0388189
AHCTF1	25909	Homo sapiens AT hook containing transcription factor 1 (AHCTF1), mRNA.	ELYS; TMBS62; MSTP108; MST108; DKFZp434N093	-0.538022	0.00202934
SSBP3	23648	Homo sapiens single stranded DNA binding protein 3 (SSBP3), transcript variant 2, mRNA.	CSDP; FLJ10355; SSDP1; SSDP	-0.534142	0.0137126
FAM83E	54854	Homo sapiens family with sequence similarity 83, member E (FAM83E), mRNA.	MGC138177; MGC138175; FLJ20200	-0.52204	0.038403
LOC100127975	100127975	PREDICTED: Homo sapiens misc_RNA (LOC100127975), partial miscRNA.		-0.517189	0.0321725
LOC100134053	100134053	PREDICTED: Homo sapiens similar to POLR2J4 protein (LOC100134053), mRNA.		-0.508326	0.0342605
LOC647389	647389	PREDICTED: Homo sapiens hypothetical protein LOC647389 (LOC647389), mRNA.		-0.5047	0.0262626
MUC4	4585	Homo sapiens mucin 4, cell surface associated (MUC4), transcript variant 1, mRNA.	HSA276359	-0.503861	0.0179341
PLDN	26258	Homo sapiens pallidin homolog (mouse) (PLDN), mRNA.	PA; PALLID	-0.502346	0.0214101
MAZ	4150	Homo sapiens MYC-associated zinc finger protein (purine-binding transcription factor) (MAZ), transcript variant 2, mRNA.	Pur-1; ZNF801; ZF87; PUR1; SAF-2; SAF-1; Zif87	-0.500668	0.0433635

## Sheet: N-9 DOWN-regulated genes
GENE SYMBOL	ENTREZ_GENE_ID	DEFINITION	SYNONYMS	Mean log2 fold-change (7 days vs baseline)	Adjusted p-value (7 days vs baseline)
AQP8	343	Homo sapiens aquaporin 8 (AQP8), mRNA.		-1.62494	0.0357849
MT1M	4499	Homo sapiens metallothionein 1M (MT1M), mRNA.	MT1; MGC118949; MT1K; MGC40498	-1.28481	0.0385277
CCL5	6352	Homo sapiens chemokine (C-C motif) ligand 5 (CCL5), mRNA.	TCP228; SISd; MGC17164; SCYA5; RANTES; D17S136E	-0.990939	0.024577
PTPRC	5788	Homo sapiens protein tyrosine phosphatase, receptor type, C (PTPRC), transcript variant 2, mRNA.	LY5; CD45; T200; LCA; B220; GP180	-0.869822	0.0369645
LRRN2	10446	Homo sapiens leucine rich repeat neuronal 2 (LRRN2), transcript variant 2, mRNA.	FIGLER7; GAC1; LRRN5; LRANK1	-0.842524	0.0434685
ATP12A	479	Homo sapiens ATPase, H+/K+ transporting, nongastric, alpha polypeptide (ATP12A), mRNA.	ATP1AL1	-0.842491	0.0369645
SLC26A2	1836	Homo sapiens solute carrier family 26 (sulfate transporter), member 2 (SLC26A2), mRNA.	DTDST; MSTP157; MST153; D5S1708; DTD; EDM4	-0.819971	0.0391173
CD3G	917	Homo sapiens CD3g molecule, gamma (CD3-TCR complex) (CD3G), mRNA.	MGC138597; CD3-GAMMA; T3G	-0.814238	0.0309767
LOC651751	651751	PREDICTED: Homo sapiens similar to Ig kappa chain V-II region RPMI 6410 precursor (LOC651751), mRNA.		-0.812452	0.0391173
MT1H	4496	Homo sapiens metallothionein 1H (MT1H), mRNA.	MGC70702; MT1	-0.79807	0.0434685
IKZF1	10320	Homo sapiens IKAROS family zinc finger 1 (Ikaros) (IKZF1), mRNA.	Hs.54452; IK1; PRO0758; hIk-1; IKAROS; LYF1; ZNFN1A1	-0.789395	0.0467574
GZMA	3001	Homo sapiens granzyme A (granzyme 1, cytotoxic T-lymphocyte-associated serine esterase 3) (GZMA), mRNA.	CTLA3; HFSP	-0.789379	0.0366711
MYH11	4629	Homo sapiens myosin, heavy chain 11, smooth muscle (MYH11), transcript variant SM1B, mRNA.	DKFZp686D19237; FLJ35232; MGC32963; MGC126726; FAA4; SMMHC; DKFZp686D10126; AAT4; SMHC	-0.773556	0.024577
EVI2B	2124	Homo sapiens ecotropic viral integration site 2B (EVI2B), mRNA.	EVDB; D17S376	-0.759744	0.0467574
CXCL12	6387	Homo sapiens chemokine (C-X-C motif) ligand 12 (stromal cell-derived factor 1) (CXCL12), transcript variant 1, mRNA.	SDF1A; TPAR1; SDF1; SDF1B; SCYB12; TLSF-b; SDF-1b; TLSF-a; PBSF; SDF-1a	-0.756937	0.0353916
IGFBP3	3486	Homo sapiens insulin-like growth factor binding protein 3 (IGFBP3), transcript variant 2, mRNA.	IBP3; BP-53	-0.74307	0.0350416
NAAA	27163	Homo sapiens N-acylethanolamine acid amidase (NAAA), transcript variant 1, mRNA.	PLT; NAAA	-0.712841	0.0391173
BTG2	7832	Homo sapiens BTG family, member 2 (BTG2), mRNA.	PC3; TIS21; MGC126064; MGC126063	-0.712064	0.0434685
CALD1	800	Homo sapiens caldesmon 1 (CALD1), transcript variant 1, mRNA.	L-CAD; CDM; MGC21352; NAG22; H-CAD	-0.711102	0.0350416
SELENBP1	8991	Homo sapiens selenium binding protein 1 (SELENBP1), mRNA.	FLJ13813; LPSB; hSP56; SP56; hSBP	-0.702245	0.0391173
IKZF3	22806	Homo sapiens IKAROS family zinc finger 3 (Aiolos) (IKZF3), transcript variant 2, mRNA.	ZNFN1A3; AIOLOS	-0.691578	0.0369645
CLEC3B	7123	Homo sapiens C-type lectin domain family 3, member B (CLEC3B), mRNA.	TN; TNA; DKFZp686H17246	-0.684279	0.0309767
HLA-DQA1	3117	PREDICTED: Homo sapiens major histocompatibility complex, class II, DQ alpha 1, transcript variant 10 (HLA-DQA1), mRNA.		-0.679745	0.0467574
CYP27A1	1593	Homo sapiens cytochrome P450, family 27, subfamily A, polypeptide 1 (CYP27A1), nuclear gene encoding mitochondrial protein, mRNA.	CYP27; CTX; CP27	-0.67962	0.0385277
EFEMP1	2202	Homo sapiens EGF-containing fibulin-like extracellular matrix protein 1 (EFEMP1), transcript variant 2, mRNA.	FBNL; MLVT; FLJ35535; FBLN3; DRAD; S1-5; MGC111353; DHRD; MTLV	-0.67901	0.0350416
TMEM37	140738	Homo sapiens transmembrane protein 37 (TMEM37), mRNA.	PR1; PR; CACNG5	-0.674341	0.0369645
FGL2	10875	Homo sapiens fibrinogen-like 2 (FGL2), mRNA.	pT49; T49	-0.673033	0.0350416
LOC649143	649143	PREDICTED: Homo sapiens similar to HLA class II histocompatibility antigen, DRB1-9 beta chain precursor (MHC class I antigen DRB1*9) (DR-9) (DR9), transcript variant 2 (LOC649143), mRNA.		-0.669736	0.0471591
FAM129A	116496	Homo sapiens family with sequence similarity 129, member A (FAM129A), transcript variant 2, mRNA.	NIBAN; FLJ38228; C1orf24	-0.669595	0.0350416
NBPF20	400818	Homo sapiens neuroblastoma breakpoint family, member 20 (NBPF20), mRNA.		-0.665378	0.0385277
EDN1	1906	Homo sapiens endothelin 1 (EDN1), mRNA.	ET1	-0.662554	0.0369645
MYL9	10398	Homo sapiens myosin, light chain 9, regulatory (MYL9), transcript variant 1, mRNA.	LC20; MYRL2; MRLC1; MLC2; MGC3505	-0.65852	0.0391173
CD74	972	Homo sapiens CD74 molecule, major histocompatibility complex, class II invariant chain (CD74), transcript variant 1, mRNA.	Ia-GAMMA; DHLAG; HLADG; protein 41	-0.652449	0.0350416
FAM107A	11170	Homo sapiens family with sequence similarity 107, member A (FAM107A), transcript variant 2, mRNA.	FLJ30158; DRR1; TU3A; FLJ45473	-0.651915	0.0434442
PGM5	5239	Homo sapiens phosphoglucomutase 5 (PGM5), mRNA.	PGMRP	-0.645322	0.0375706
SEPT6	23157	Homo sapiens septin 6 (SEPT6), transcript variant III, mRNA.	SEP2; RP5-876A24.2; MGC16619; SEPT2; MGC20339; KIAA0128	-0.640975	0.0369645
TMEM140	55281	Homo sapiens transmembrane protein 140 (TMEM140), mRNA.	FLJ11000	-0.637791	0.0350416
DES	1674	Homo sapiens desmin (DES), mRNA.	CSM2; FLJ41013; FLJ39719; CSM1; FLJ41793; FLJ12025; CMD1I	-0.619933	0.0457254
TAGLN	6876	Homo sapiens transgelin (TAGLN), transcript variant 2, mRNA.	TAGLN1; WS3-10; SM22; DKFZp686P11128; SMCC	-0.605636	0.0434685
NCF1	653361	Homo sapiens neutrophil cytosolic factor 1 (NCF1), mRNA.	NOXO2; SH3PXD1A; NCF1A; p47phox	-0.597413	0.0457254
HINT3	135114	Homo sapiens histidine triad nucleotide binding protein 3 (HINT3), mRNA.		-0.596396	0.0434685
HLA-DRB3	3125	Homo sapiens major histocompatibility complex, class II, DR beta 3 (HLA-DRB3), mRNA.	MGC117330; HLA-DR3B	-0.585693	0.0467574
RUNDC2C	440352	Homo sapiens RUN domain containing 2C (RUNDC2C), non-coding RNA.		-0.585434	0.0391173
RORA	6095	Homo sapiens RAR-related orphan receptor A (RORA), transcript variant 3, mRNA.	NR1F1; MGC119326; ROR2; RZRA; ROR1; MGC119329; ROR3	-0.576127	0.0467574
TNFRSF13B	23495	Homo sapiens tumor necrosis factor receptor superfamily, member 13B (TNFRSF13B), mRNA.	TACI; TNFRSF14B; FLJ39942; CD267; MGC133214; MGC39952; CVID	-0.572044	0.0467574
RETNLB	84666	Homo sapiens resistin like beta (RETNLB), mRNA.	RELMb; RELMbeta; HXCP2; FIZZ2; RELM-beta; XCP2; FIZZ1	-0.571994	0.0467574
PKDCC	91461	Homo sapiens protein kinase domain containing, cytoplasmic homolog (mouse) (PKDCC), mRNA.		-0.561142	0.045784
EIF3CL	728689	Homo sapiens eukaryotic translation initiation factor 3, subunit C-like (EIF3CL), mRNA.		-0.55172	0.0467574
RARRES2	5919	Homo sapiens retinoic acid receptor responder (tazarotene induced) 2 (RARRES2), mRNA.	TIG2; HP10433	-0.548709	0.0481656
S100A4	6275	Homo sapiens S100 calcium binding protein A4 (S100A4), transcript variant 2, mRNA.	FSP1; MTS1; 18A2; PEL98; P9KA; CAPL; 42A	-0.547729	0.0481656
CUEDC1	404093	Homo sapiens CUE domain containing 1 (CUEDC1), mRNA.	DKFZp547L163; FLJ20739	-0.546362	0.0385277
RARRES3	5920	Homo sapiens retinoic acid receptor responder (tazarotene induced) 3 (RARRES3), mRNA.	MGC8906; HRASLS4; TIG3; RIG1	-0.54561	0.0427967
NAALADL1	10004	Homo sapiens N-acetylated alpha-linked acidic dipeptidase-like 1 (NAALADL1), mRNA.	I100; NAALADASEL	-0.538348	0.0467574
ABCG1	9619	Homo sapiens ATP-binding cassette, sub-family G (WHITE), member 1 (ABCG1), transcript variant 2, mRNA.	WHITE1; ABC8; MGC34313	-0.527055	0.0434685
PLAC9	219348	Homo sapiens placenta-specific 9 (PLAC9), mRNA.	MGC104710	-0.522907	0.0454946
SNORD13	692084	Homo sapiens small nucleolar RNA, C/D box 13 (SNORD13), small nucleolar RNA.	U13	-0.501432	0.0434685

## Sheet: Tenofovir UP-regulated genes
GENE SYMBOL	ENTREZ_GENE_ID	DEFINITION	SYNONYMS	Mean log2 fold-change (7 days vs baseline)	Adjusted p-value (7 days vs baseline)
C4orf7	260436	Homo sapiens chromosome 4 open reading frame 7 (C4orf7), mRNA.	FDC-SP; MGC71894	1.98466	0.000730077
CCL19	6363	Homo sapiens chemokine (C-C motif) ligand 19 (CCL19), mRNA.	MIP3B; CKb11; MIP-3b; ELC; MGC34433; SCYA19	1.62303	0.00224068
SPINK4	27290	Homo sapiens serine peptidase inhibitor, Kazal type 4 (SPINK4), mRNA.	PEC-60; MGC133107	1.46598	0.0408299
UBD	10537	Homo sapiens ubiquitin D (UBD), mRNA.	UBD-3; FAT10	1.34998	0.00114902
CR2	1380	Homo sapiens complement component (3d/Epstein Barr virus) receptor 2 (CR2), transcript variant 2, mRNA.	CD21; SLEB9; C3DR	1.34723	0.00326072
CXCL9	4283	Homo sapiens chemokine (C-X-C motif) ligand 9 (CXCL9), mRNA.	MIG; crg-10; Humig; SCYB9; CMK	1.26786	0.00505553
CXCL13	10563	Homo sapiens chemokine (C-X-C motif) ligand 13 (B-cell chemoattractant) (CXCL13), mRNA.	SCYB13; ANGIE; BCA1; ANGIE2; BCA-1; BLR1L; BLC	1.2608	0.0139133
CCL23	6368	Homo sapiens chemokine (C-C motif) ligand 23 (CCL23), transcript variant CKbeta8-1, mRNA.	Ckb-8-1; CKb8; CK-BETA-8; SCYA23; MIP3; Ckb-8; MIP-3; MPIF-1	1.24985	0.0239187
CCL21	6366	Homo sapiens chemokine (C-C motif) ligand 21 (CCL21), mRNA.	MGC34555; 6Ckine; TCA4; SLC; ECL; CKb9; SCYA21	1.20027	0.00685724
FCRLA	84824	Homo sapiens Fc receptor-like A (FCRLA), mRNA.	FCRLX; FCRLe; MGC4595; FCRLM1; FCRLc1; RP11-474I16.5; FCRLb; FCRL; FREB; FCRLd; FCRLc2	1.13857	0.00740907
MMP12	4321	Homo sapiens matrix metallopeptidase 12 (macrophage elastase) (MMP12), mRNA.	MME; HME	1.08768	0.0100952
MMP9	4318	Homo sapiens matrix metallopeptidase 9 (gelatinase B, 92kDa gelatinase, 92kDa type IV collagenase) (MMP9), mRNA.	MMP-9; GELB; CLG4B	1.04468	0.0116271
CD19	930	Homo sapiens CD19 molecule (CD19), mRNA.	B4; MGC12802	1.01056	0.00953075
CD3D	915	Homo sapiens CD3d molecule, delta (CD3-TCR complex) (CD3D), transcript variant 1, mRNA.	T3D; CD3-DELTA	0.991953	0.00135841
KIAA0101	9768	Homo sapiens KIAA0101 (KIAA0101), transcript variant 1, mRNA.	L5; p15(PAF); OEATC1; OEATC-1; NS5ATP9	0.95949	0.00114902
MX1	4599	Homo sapiens myxovirus (influenza virus) resistance 1, interferon-inducible protein p78 (mouse) (MX1), mRNA.	MxA; IFI78; MX; IFI-78K	0.937744	0.0348013
CD7	924	Homo sapiens CD7 molecule (CD7), mRNA.	Tp40; LEU-9; GP40; TP41	0.920351	6.05786e-05
CCL2	6347	Homo sapiens chemokine (C-C motif) ligand 2 (CCL2), mRNA.	SMC-CF; MCP1; MCAF; HSMCR30; GDCF-2; SCYA2; HC11; MGC9434; MCP-1; GDCF-2 HC11	0.90504	0.0216787
LOC653879	653879	PREDICTED: Homo sapiens similar to Complement C3 precursor (LOC653879), mRNA.		0.903736	0.0206512
C3	718	Homo sapiens complement component 3 (C3), mRNA.	ASP; CPAMD1	0.880486	0.0149327
CD83	9308	Homo sapiens CD83 molecule (CD83), transcript variant 1, mRNA.	HB15; BL11	0.87259	0.0136812
VPREB3	29802	Homo sapiens pre-B lymphocyte gene 3 (VPREB3), mRNA.	8HS20; N27C7-2	0.8684	0.0408299
LOC389342	389342	PREDICTED: Homo sapiens similar to QM protein, transcript variant 11 (LOC389342), mRNA.		0.864136	0.0400767
ENPP2	5168	Homo sapiens ectonucleotide pyrophosphatase/phosphodiesterase 2 (ENPP2), transcript variant 2, mRNA.	NPP2; ATX; LysoPLD; ATX-X; PDNP2; PD-IALPHA; FLJ26803	0.84672	0.000879147
ISG15	9636	Homo sapiens ISG15 ubiquitin-like modifier (ISG15), mRNA.	G1P2; UCRP; IFI15	0.83434	0.0388189
EBI2	1880	Homo sapiens Epstein-Barr virus induced gene 2 (lymphocyte-specific G protein-coupled receptor) (EBI2), mRNA.		0.829026	0.0319785
CXCR5	643	Homo sapiens chemokine (C-X-C motif) receptor 5 (CXCR5), transcript variant 2, mRNA.	BLR1; MDR15; MGC117347; CXCR5; CD185	0.824441	0.0095978
EPSTI1	94240	Homo sapiens epithelial stromal interaction 1 (breast) (EPSTI1), transcript variant 2, mRNA.	BRESI1; MGC29634	0.819931	0.0108188
SELL	6402	Homo sapiens selectin L (SELL), mRNA.	Leu-8; LSEL; LNHR; LAM1; LECAM1; hLHRc; TQ1; LAM-1; PLNHR; CD62L; LYAM1; Lyam-1	0.815255	0.00480922
NAPSB	256236	Homo sapiens napsin B aspartic peptidase pseudogene (NAPSB), non-coding RNA. XR_001413	NAPB; NAP1L; NAP2	0.813126	0.0170804
HOPX	84525	Homo sapiens HOP homeobox (HOPX), transcript variant 3, mRNA.	HOP; MGC20820; LAGY; Cameo; SMAP31; OB1; Toto; NECC1	0.812819	0.00451294
GBP1	2633	Homo sapiens guanylate binding protein 1, interferon-inducible, 67kDa (GBP1), mRNA.		0.803608	0.00234783
C1orf81	647215	PREDICTED: Homo sapiens misc_RNA (C1orf81), miscRNA.		0.798267	0.0282948
IFI27	3429	Homo sapiens interferon, alpha-inducible protein 27 (IFI27), transcript variant 2, mRNA.	FAM14D; P27; ISG12	0.796142	0.00896481
LCP1	3936	Homo sapiens lymphocyte cytosolic protein 1 (L-plastin) (LCP1), mRNA.	L-PLASTIN; PLS2; FLJ26114; CP64; DKFZp781A23186; FLJ39956; LC64P; FLJ25423	0.789577	0.00888826
PTGDS	5730	Homo sapiens prostaglandin D2 synthase 21kDa (brain) (PTGDS), mRNA.	PGD2; PGDS; PGDS2; PDS	0.787247	0.0288399
DCK	1633	Homo sapiens deoxycytidine kinase (DCK), mRNA.	MGC117410; MGC138632	0.782693	0.00299103
RPL10A	4736	Homo sapiens ribosomal protein L10a (RPL10A), mRNA.	Csa-19; NEDD6	0.770142	0.00110092
IFIT1	3434	Homo sapiens interferon-induced protein with tetratricopeptide repeats 1 (IFIT1), transcript variant 2, mRNA.	RNM561; IFI-56; IFI56; GARG-16; IFNAI1; G10P1; ISG56	0.763997	0.0391691
FAIM3	9214	Homo sapiens Fas apoptotic inhibitory molecule 3 (FAIM3), mRNA.	TOSO	0.763684	0.0229399
ANXA2	302	Homo sapiens annexin A2 (ANXA2), transcript variant 2, mRNA.	P36; LPC2D; ANX2L4; ANX2; PAP-IV; CAL1H; LIP2; LPC2	0.763106	0.00378096
FCRL3	115352	Homo sapiens Fc receptor-like 3 (FCRL3), transcript variant 2, mRNA.	IFGP3; FCRH3; SPAP2; IRTA3	0.757155	0.00668365
DDX60	55601	Homo sapiens DEAD (Asp-Glu-Ala-Asp) box polypeptide 60 (DDX60), mRNA.	FLJ20035; FLJ10787	0.754108	0.0233534
PAFAH1B3	5050	Homo sapiens platelet-activating factor acetylhydrolase, isoform Ib, gamma subunit 29kDa (PAFAH1B3), mRNA.		0.750978	0.0326075
IDO1	3620	Homo sapiens indoleamine 2,3-dioxygenase 1 (IDO1), mRNA.	CD107B; IDO	0.748432	0.00414118
KLRB1	3820	Homo sapiens killer cell lectin-like receptor subfamily B, member 1 (KLRB1), mRNA.	hNKR-P1A; NKR-P1; CLEC5B; CD161; MGC138614; NKRP1A; NKR-P1A; NKR	0.737072	0.0109759
APOBEC3B	9582	Homo sapiens apolipoprotein B mRNA editing enzyme, catalytic polypeptide-like 3B (APOBEC3B), mRNA.	FLJ21201; APOBEC1L; ARCD3; DJ742C19.2; PHRBNL; ARP4; bK150C2.2	0.734842	0.00685724
CD247	919	Homo sapiens CD247 molecule (CD247), transcript variant 1, mRNA.	CD3Q; CD3H; TCRZ; CD3Z; CD3-ZETA	0.72895	0.00236062
SIGLEC10	89790	Homo sapiens sialic acid binding Ig-like lectin 10 (SIGLEC10), mRNA.	SLG2; SIGLEC-10; PRO940	0.723549	0.00166648
GZMB	3002	Homo sapiens granzyme B (granzyme 2, cytotoxic T-lymphocyte-associated serine esterase 1) (GZMB), mRNA.	CCPI; CGL1; CTSGL1; CGL-1; CSP-B; CTLA1; CSPB; SECT; HLP	0.723032	0.00527453
CCR7	1236	Homo sapiens chemokine (C-C motif) receptor 7 (CCR7), mRNA.	CMKBR7; EBI1; CD197; CDw197; BLR2	0.720401	0.0431158
TRIM22	10346	Homo sapiens tripartite motif-containing 22 (TRIM22), mRNA.	STAF50; GPSTAF50; RNF94	0.717035	0.0167688
DNAJC12	56521	Homo sapiens DnaJ (Hsp40) homolog, subfamily C, member 12 (DNAJC12), transcript variant 1, mRNA.	RP11-57G10.2; JDP1	0.704825	0.0053163
GZMA	3001	Homo sapiens granzyme A (granzyme 1, cytotoxic T-lymphocyte-associated serine esterase 3) (GZMA), mRNA.	CTLA3; HFSP	0.70206	0.0214597
ABI3BP	25890	Homo sapiens ABI gene family, member 3 (NESH) binding protein (ABI3BP), mRNA.	FLJ41743; FLJ41754; TARSH; NESHBP	0.69179	0.0192492
CD79B	974	Homo sapiens CD79B antigen (immunoglobulin-associated beta) (CD79B), transcript variant 2, mRNA.	IGB; B29	0.691574	0.0162837
LOC606724	606724	Homo sapiens coronin, actin binding protein, 1A pseudogene (LOC606724), non-coding RNA.		0.687714	0.0108803
RASSF2	9770	Homo sapiens Ras association (RalGDS/AF-6) domain family 2 (RASSF2), transcript variant 2, mRNA.	DKFZp781O1747; KIAA0168	0.685572	0.00722398
CDC45L	8318	Homo sapiens CDC45 cell division cycle 45-like (S. cerevisiae) (CDC45L), mRNA.	CDC45L2; CDC45; PORC-PI-1	0.685561	0.00436424
PRDX3	10935	Homo sapiens peroxiredoxin 3 (PRDX3), nuclear gene encoding mitochondrial protein, transcript variant 1, mRNA.	MGC104387; MER5; AOP-1; MGC24293; AOP1; PRO1748; SP-22	0.683143	0.00451271
LOC90925	90925	Homo sapiens hypothetical protein LOC90925 (LOC90925), mRNA.		0.674135	0.0136812
CTSL2	1515	Homo sapiens cathepsin L2 (CTSL2), mRNA.	CTSV; CATL2; CTSU; MGC125957	0.668214	0.0344053
SASH3	54440	Homo sapiens SAM and SH3 domain containing 3 (SASH3), mRNA.	753P9; CXorf9; SH3D6C; SLY	0.665544	0.00262118
GEM	2669	Homo sapiens GTP binding protein overexpressed in skeletal muscle (GEM), transcript variant 2, mRNA.	KIR; MGC26294	0.665261	0.019394
CPA3	1359	Homo sapiens carboxypeptidase A3 (mast cell) (CPA3), mRNA.		0.664883	0.0113752
TOP2A	7153	Homo sapiens topoisomerase (DNA) II alpha 170kDa (TOP2A), mRNA.	TOP2; TP2A	0.66391	0.0281552
SLC3A1	6519	Homo sapiens solute carrier family 3 (cystine, dibasic and neutral amino acid transporters, activator of cystine, dibasic and neutral amino acid transport), member 1 (SLC3A1), mRNA.	NBAT; CSNU1; ATR1; D2H; RBAT; FLJ34681	0.663485	0.0408299
LTB	4050	Homo sapiens lymphotoxin beta (TNF superfamily, member 3) (LTB), transcript variant 1, mRNA.	p33; TNFSF3; TNFC	0.662958	0.0366114
C1orf162	128346	Homo sapiens chromosome 1 open reading frame 162 (C1orf162), mRNA.	MGC24133	0.660976	0.001163
GREM1	26585	Homo sapiens gremlin 1, cysteine knot superfamily, homolog (Xenopus laevis) (GREM1), mRNA.	DAND2; DRM; MGC126660; GREMLIN; PIG2; IHG-2; CKTSF1B1	0.660098	0.0419917
CD52	1043	Homo sapiens CD52 molecule (CD52), mRNA.	CDW52	0.656516	0.0379744
AGR3	155465	Homo sapiens anterior gradient homolog 3 (Xenopus laevis) (AGR3), mRNA.	HAG3; hAG-3; BCMP11	0.655572	0.0211433
SERPINA3	12	Homo sapiens serpin peptidase inhibitor, clade A (alpha-1 antiproteinase, antitrypsin), member 3 (SERPINA3), mRNA.	GIG24; GIG25; AACT; MGC88254; ACT	0.652214	0.0205373
ANKRD37	353322	Homo sapiens ankyrin repeat domain 37 (ANKRD37), mRNA.	Lrp2bp; MGC111507	0.649198	0.0313001
ALOX5AP	241	Homo sapiens arachidonate 5-lipoxygenase-activating protein (ALOX5AP), mRNA.	FLAP	0.643783	0.00827233
LAMP3	27074	Homo sapiens lysosomal-associated membrane protein 3 (LAMP3), mRNA.	TSC403; DC-LAMP; CD208; LAMP; DCLAMP	0.639383	0.0132125
ABHD3	171586	Homo sapiens abhydrolase domain containing 3 (ABHD3), mRNA.	LABH3; MGC11259	0.635995	0.0317436
LYL1	4066	Homo sapiens lymphoblastic leukemia derived sequence 1 (LYL1), mRNA.		0.630495	0.00625549
GRAP	10750	Homo sapiens GRB2-related adaptor protein (GRAP), mRNA.	MGC64880	0.630123	0.0153261
CDKN3	1033	Homo sapiens cyclin-dependent kinase inhibitor 3 (CDK2-associated dual specificity phosphatase) (CDKN3), mRNA.	CDI1; KAP; MGC70625; FLJ25787; CIP2; KAP1	0.629737	0.0162848
CEP55	55165	Homo sapiens centrosomal protein 55kDa (CEP55), mRNA.	URCC6; C10orf3; FLJ10540	0.629691	0.0122279
GPR128	84873	Homo sapiens G protein-coupled receptor 128 (GPR128), mRNA.	MGC163260; FLJ29035; MGC142011; FLJ16382; FLJ14454	0.628424	0.0340029
PLEK	5341	Homo sapiens pleckstrin (PLEK), mRNA.	P47; FLJ27168	0.626641	0.0130506
NUSAP1	51203	Homo sapiens nucleolar and spindle associated protein 1 (NUSAP1), transcript variant 2, mRNA.	LNP; FLJ13421; SAPL; BM037; PRO0310p1; Q0310; ANKT	0.624091	0.0163069
UGT2A3	79799	Homo sapiens UDP glucuronosyltransferase 2 family, polypeptide A3 (UGT2A3), mRNA.	FLJ21934	0.624054	0.03508
CD53	963	Homo sapiens CD53 molecule (CD53), transcript variant 2, mRNA.	MOX44; TSPAN25	0.613542	0.0108075
PPP1R16B	26051	Homo sapiens protein phosphatase 1, regulatory (inhibitor) subunit 16B (PPP1R16B), mRNA.	TIMAP; KIAA0823; ANKRD4	0.613073	0.00356499
SLAMF6	114836	Homo sapiens SLAM family member 6 (SLAMF6), mRNA.	NTB-A; SF2000; NTBA; MGC104953; KALIb; Ly108; KALI	0.611083	0.0135217
CORO1A	11151	Homo sapiens coronin, actin binding protein, 1A (CORO1A), mRNA.	MGC117380; TACO; p57; HCORO1; CLABP; FLJ41407; CLIPINA	0.60717	0.0215799
HPGD	3248	Homo sapiens hydroxyprostaglandin dehydrogenase 15-(NAD) (HPGD), mRNA.	PGDH; 15-PGDH; PGDH1	0.606281	0.0435289
LUM	4060	Homo sapiens lumican (LUM), mRNA.	SLRR2D; LDC	0.604386	0.0200918
IL2RB	3560	Homo sapiens interleukin 2 receptor, beta (IL2RB), mRNA.	CD122; P70-75	0.60402	0.00262118
C13orf15	28984	Homo sapiens chromosome 13 open reading frame 15 (C13orf15), mRNA.	RGC-32; KIAA0564; bA157L14.2; MGC87338; RGC32	0.603813	0.0104714
CYBRD1	79901	Homo sapiens cytochrome b reductase 1 (CYBRD1), mRNA.	FLJ23462; FRRS3; DCYTB	0.595047	0.0329644
TLR10	81793	Homo sapiens toll-like receptor 10 (TLR10), transcript variant 2, mRNA.	CD290; MGC126399; MGC126398; MGC104967	0.594232	0.0197931
CTLA4	1493	Homo sapiens cytotoxic T-lymphocyte-associated protein 4 (CTLA4), transcript variant 1, mRNA.	CTLA-4; GSE; CD; CELIAC3; IDDM12; CD152	0.588008	0.0197931
MGP	4256	Homo sapiens matrix Gla protein (MGP), mRNA.	NTI; GIG36; MGLAP	0.585963	0.0329644
CHMP5	51510	Homo sapiens chromatin modifying protein 5 (CHMP5), mRNA.	C9orf83; SNF7DC2; CGI-34; PNAS-2; HSPC177	0.583371	0.0234838
VCAM1	7412	Homo sapiens vascular cell adhesion molecule 1 (VCAM1), transcript variant 1, mRNA.	INCAM-100; MGC99561; DKFZp779G2333; CD106	0.582465	0.00311329
LEF1	51176	Homo sapiens lymphoid enhancer-binding factor 1 (LEF1), mRNA.	TCF1ALPHA; DKFZp586H0919	0.577268	0.0159761
MMP7	4316	Homo sapiens matrix metallopeptidase 7 (matrilysin, uterine) (MMP7), mRNA.	MMP-7; PUMP-1; MPSL1	0.57633	0.0388189
CD8A	925	Homo sapiens CD8a molecule (CD8A), transcript variant 2, mRNA.	p32; CD8; MAL; Leu2	0.574216	0.0398995
WASPIP	7456	Homo sapiens Wiskott-Aldrich syndrome protein interacting protein (WASPIP), mRNA.	WIP; PRPL-2	0.571773	0.0299828
FSCN1	6624	Homo sapiens fascin homolog 1, actin-bundling protein (Strongylocentrotus purpuratus) (FSCN1), mRNA.	FLJ38511; SNL; p55	0.571246	0.0160519
LOC92755	92755	PREDICTED: Homo sapiens misc_RNA (LOC92755), miscRNA.		0.570939	0.0299828
KDELR3	11015	Homo sapiens KDEL (Lys-Asp-Glu-Leu) endoplasmic reticulum protein retention receptor 3 (KDELR3), transcript variant 2, mRNA.	ERD2L3	0.569742	0.00328839
LRMP	4033	Homo sapiens lymphoid-restricted membrane protein (LRMP), mRNA.	JAW1	0.568897	0.037997
TUBA1A	7846	Homo sapiens tubulin, alpha 1a (TUBA1A), mRNA.	LIS3; FLJ25113; TUBA3; B-ALPHA-1	0.567233	0.00761688
RFTN1	23180	Homo sapiens raftlin, lipid raft linker 1 (RFTN1), mRNA.	PIG9; RAFTLIN; KIAA0084; MGC141678; PIB10; MGC44480; MIG2; FLJ23866	0.565176	0.026901
HLA-DOB	3112	Homo sapiens major histocompatibility complex, class II, DO beta (HLA-DOB), mRNA.	DOB	0.563401	0.0195357
INDO	3620	Homo sapiens indoleamine-pyrrole 2,3 dioxygenase (INDO), mRNA.	CD107B; IDO	0.562573	0.00613717
CNIH	10175	Homo sapiens cornichon homolog (Drosophila) (CNIH), mRNA.	CNIH1; CNIL; TGAM77; MGC117156	0.559789	0.0135335
HHLA2	11148	Homo sapiens HERV-H LTR-associating 2 (HHLA2), mRNA.		0.550418	0.0358704
GZMK	3003	Homo sapiens granzyme K (granzyme 3; tryptase II) (GZMK), mRNA.	TRYP2	0.549617	0.012879
HCLS1	3059	Homo sapiens hematopoietic cell-specific Lyn substrate 1 (HCLS1), mRNA.	HS1; CTTNL	0.544945	0.0118729
ITM2A	9452	Homo sapiens integral membrane protein 2A (ITM2A), mRNA.	E25A; BRICD2A	0.544663	0.038403
XAF1	54739	Homo sapiens XIAP associated factor 1 (XAF1), transcript variant 2, mRNA.	HSXIAPAF1; BIRC4BP	0.543337	0.0391214
LOC642989	642989	PREDICTED: Homo sapiens similar to 40S ribosomal protein S25 (LOC642989), mRNA.		0.536702	0.0126781
ARHGAP9	64333	Homo sapiens Rho GTPase activating protein 9 (ARHGAP9), transcript variant 2, mRNA.	10C; RGL1; FLJ16525; MGC1295	0.536668	0.0191366
KIAA1949	170954	Homo sapiens KIAA1949 (KIAA1949), mRNA.	HKMT1098	0.535768	0.0193944
PVRIG	79037	Homo sapiens poliovirus receptor related immunoglobulin domain containing (PVRIG), mRNA.	MGC138297; MGC2463; MGC138295; MGC104322; C7orf15	0.535647	0.0167861
FYB	2533	Homo sapiens FYN binding protein (FYB-120/130) (FYB), transcript variant 1, mRNA.	PRO0823; SLAP-130; ADAP	0.534895	0.0365592
OAS2	4939	Homo sapiens 2'-5'-oligoadenylate synthetase 2, 69/71kDa (OAS2), transcript variant 1, mRNA.	MGC78578	0.534613	0.0388189
CTSK	1513	Homo sapiens cathepsin K (CTSK), mRNA.	CTSO2; CTSO; CTSO1; PKND; CTS02; PYCD; MGC23107	0.533385	0.0191832
GBP4	115361	Homo sapiens guanylate binding protein 4 (GBP4), mRNA.	Mpa2	0.531097	0.0201821
C1S	716	Homo sapiens complement component 1, s subcomponent (C1S), transcript variant 1, mRNA.		0.527054	0.0199472
F13A1	2162	Homo sapiens coagulation factor XIII, A1 polypeptide (F13A1), mRNA.	F13A	0.525393	0.0450233
PRRX1	5396	Homo sapiens paired related homeobox 1 (PRRX1), transcript variant pmx-1a, mRNA.	PRX1; PMX1; PHOX1	0.52398	0.0206512
PSMB9	5698	Homo sapiens proteasome (prosome, macropain) subunit, beta type, 9 (large multifunctional peptidase 2) (PSMB9), transcript variant 1, mRNA.	MGC70470; PSMB6i; beta1i; LMP2; RING12	0.523138	0.0142626
KYNU	8942	Homo sapiens kynureninase (L-kynurenine hydrolase) (KYNU), transcript variant 1, mRNA.		0.522706	0.0132125
FMO5	2330	Homo sapiens flavin containing monooxygenase 5 (FMO5), mRNA.		0.516357	0.024305
LY96	23643	Homo sapiens lymphocyte antigen 96 (LY96), mRNA.	MD-2	0.515996	0.0153136
CCR6	1235	Homo sapiens chemokine (C-C motif) receptor 6 (CCR6), transcript variant 2, mRNA.	CKR-L3; DRY-6; CKR6; BN-1; GPR29; DCR2; GPR-CY4; CD196; STRL22; GPRCY4; CKRL3; CMKBR6	0.512159	0.0281552
CD2	914	Homo sapiens CD2 molecule (CD2), mRNA.	SRBC; T11	0.51154	0.0214101
C10orf81	79949	Homo sapiens chromosome 10 open reading frame 81 (C10orf81), mRNA.	FLJ23537; bA211N11.2; RP11-211N11.2	0.506266	0.029513
CD6	923	Homo sapiens CD6 molecule (CD6), mRNA.	TP120	0.504391	0.0217491
CTSH	1512	Homo sapiens cathepsin H (CTSH), transcript variant 1, mRNA.	CPSB; ACC-4; MGC1519; minichain; ACC-5; DKFZp686B24257	0.502937	0.0231043

## Sheet: N-9 UP-regulated genes
GENE SYMBOL	ENTREZ_GENE_ID	DEFINITION	SYNONYMS	Mean log2 fold-change (7 days vs baseline)	Adjusted p-value (7 days vs baseline)
FGFBP1	9982	Homo sapiens fibroblast growth factor binding protein 1 (FGFBP1), mRNA.	FGFBP; HBP17	1.54991	0.0176234
REG4	83998	Homo sapiens regenerating islet-derived family, member 4 (REG4), mRNA.	GISP; RELP; REG-IV	1.36011	0.024577
SPINK4	27290	Homo sapiens serine peptidase inhibitor, Kazal type 4 (SPINK4), mRNA.	PEC-60; MGC133107	1.35586	0.0350416
DHRS9	10170	Homo sapiens dehydrogenase/reductase (SDR family) member 9 (DHRS9), transcript variant 1, mRNA.	RDHL; 3alpha-HSD; RETSDR8; RDH15	1.28036	0.0216965
MMP3	4314	Homo sapiens matrix metallopeptidase 3 (stromelysin 1, progelatinase) (MMP3), mRNA.	STR1; STMY; MGC126102; STMY1; SL-1; MGC126103; MGC126104; MMP-3	1.27405	0.0176234
OLFM4	10562	Homo sapiens olfactomedin 4 (OLFM4), mRNA.	bA209J19.1; OlfD; KIAA4294; GW112; GC1	1.21268	0.024577
PHLDA2	7262	Homo sapiens pleckstrin homology-like domain, family A, member 2 (PHLDA2), mRNA.	HLDA2; BWR1C; IPL; TSSC3; BRW1C	1.21095	0.0176234
S100P	6286	Homo sapiens S100 calcium binding protein P (S100P), mRNA.	MIG9	1.11178	0.0176234
SC4MOL	6307	Homo sapiens sterol-C4-methyl oxidase-like (SC4MOL), transcript variant 2, mRNA.	MGC104344; ERG25; DESP4	1.11143	0.024577
HYAL1	3373	Homo sapiens hyaluronoglucosaminidase 1 (HYAL1), transcript variant 2, mRNA.	LUCA1; HYAL-1; MGC45987; NAT6	1.08953	0.0216965
SQLE	6713	Homo sapiens squalene epoxidase (SQLE), mRNA.	FLJ30795	1.08771	0.024577
TFF1	7031	Homo sapiens trefoil factor 1 (TFF1), mRNA.	D21S21; BCEI; pNR-2; pS2; HP1.A; HPS2	1.08086	0.0350416
HMGCS1	3157	Homo sapiens 3-hydroxy-3-methylglutaryl-Coenzyme A synthase 1 (soluble) (HMGCS1), transcript variant 2, mRNA.	MGC90332; HMGCS	1.07136	0.0350416
KRT20	54474	Homo sapiens keratin 20 (KRT20), mRNA.	K20; CK20; KRT21; CD20; MGC35423	1.06199	0.0176234
SCD	6319	Homo sapiens stearoyl-CoA desaturase (delta-9-desaturase) (SCD), mRNA.	SCD1; PRO0998; MSTP008; FADS5	1.05577	0.0350416
SERPINB5	5268	Homo sapiens serpin peptidase inhibitor, clade B (ovalbumin), member 5 (SERPINB5), mRNA.	PI5; maspin	0.936115	0.0369645
ANXA2P1	303	Homo sapiens annexin A2 pseudogene 1 (ANXA2P1) on chromosome 4.	LPC2A; ANX2L1; ANX2P1	0.922202	0.0216965
ADORA2B	136	Homo sapiens adenosine A2b receptor (ADORA2B), mRNA.	ADORA2	0.90437	0.0176234
CEACAM1	634	Homo sapiens carcinoembryonic antigen-related cell adhesion molecule 1 (biliary glycoprotein) (CEACAM1), transcript variant 1, mRNA.	BGPI; BGP; BGP1	0.901655	0.0354586
ELOVL6	79071	Homo sapiens ELOVL family member 6, elongation of long chain fatty acids (FEN1/Elo2, SUR4/Elo3-like, yeast) (ELOVL6), mRNA.	MGC5487; FLJ23378; FAE; LCE	0.894605	0.0176234
AKR1B15	441282	Homo sapiens aldo-keto reductase family 1, member B15 (AKR1B15), mRNA.		0.889728	0.0177971
SPINK5	11005	Homo sapiens serine peptidase inhibitor, Kazal type 5 (SPINK5), mRNA.	FLJ21544; NS; LETKI; LEKTI; NETS; VAKTI	0.874851	0.024577
REG1A	5967	Homo sapiens regenerating islet-derived 1 alpha (pancreatic stone protein, pancreatic thread protein) (REG1A), mRNA.	PSPS1; MGC12447; ICRF; P19; PTP; PSPS; PSP; REG	0.874317	0.0467574
FASN	2194	Homo sapiens fatty acid synthase (FASN), mRNA.	MGC14367; MGC15706; FAS; OA-519	0.865746	0.034876
DHCR7	1717	Homo sapiens 7-dehydrocholesterol reductase (DHCR7), transcript variant 1, mRNA.	SLOS	0.843097	0.0369645
CYP51A1	1595	Homo sapiens cytochrome P450, family 51, subfamily A, polypeptide 1 (CYP51A1), mRNA.	CP51; CYPL1; P450-14DM; CYP51; P450L1; LDM	0.839457	0.0216965
S100A16	140576	Homo sapiens S100 calcium binding protein A16 (S100A16), mRNA.	DT1P1A7; MGC17528; S100F; AAG13	0.834437	0.0216965
LEPREL1	55214	Homo sapiens leprecan-like 1 (LEPREL1), mRNA.	FLJ10718; MLAT4; P3H2	0.829771	0.0270324
LOC644151	644151	PREDICTED: Homo sapiens similar to calpain 8 (LOC644151), mRNA.		0.795193	0.0467574
C20orf56	140828	PREDICTED: Homo sapiens misc_RNA (C20orf56), miscRNA.		0.76077	0.0363348
TRIM15	89870	Homo sapiens tripartite motif-containing 15 (TRIM15), mRNA.	ZNF178; ZNFB7; RNF93	0.760346	0.0350416
MMP10	4319	Homo sapiens matrix metallopeptidase 10 (stromelysin 2) (MMP10), mRNA.	SL-2; STMY2	0.75975	0.0350416
ACAT2	39	Homo sapiens acetyl-Coenzyme A acetyltransferase 2 (ACAT2), mRNA.		0.757494	0.0350416
INSIG1	3638	Homo sapiens insulin induced gene 1 (INSIG1), transcript variant 2, mRNA.	MGC1405; CL-6	0.748121	0.0467574
LDLR	3949	Homo sapiens low density lipoprotein receptor (familial hypercholesterolemia) (LDLR), mRNA.	FHC; FH	0.74716	0.0467574
ASS1	445	Homo sapiens argininosuccinate synthetase 1 (ASS1), transcript variant 1, mRNA.	CTLN1; ASS	0.724998	0.024577
KDELR3	11015	Homo sapiens KDEL (Lys-Asp-Glu-Leu) endoplasmic reticulum protein retention receptor 3 (KDELR3), transcript variant 2, mRNA.	ERD2L3	0.717716	0.0369645
LOC341230	341230	PREDICTED: Homo sapiens misc_RNA (LOC341230), miscRNA.		0.704567	0.0369645
LSS	4047	Homo sapiens lanosterol synthase (2,3-oxidosqualene-lanosterol cyclase) (LSS), transcript variant 1, mRNA.	OSC	0.703544	0.0467574
LOC149501	149501	PREDICTED: Homo sapiens misc_RNA (LOC149501), miscRNA.		0.697392	0.0309803
IL1RN	3557	Homo sapiens interleukin 1 receptor antagonist (IL1RN), transcript variant 4, mRNA.	ICIL-1RA; IRAP; IL-1ra3; MGC10430; IL1F3; IL1RA	0.67874	0.0350416
LAMA3	3909	Homo sapiens laminin, alpha 3 (LAMA3), transcript variant 1, mRNA.	LOCS; E170; lama3a; LAMNA	0.674786	0.0467574
LOC730167	730167	PREDICTED: Homo sapiens similar to protein tyrosine phosphatase 4a1, transcript variant 1 (LOC730167), mRNA.		0.669926	0.0385277
GDPD3	79153	Homo sapiens glycerophosphodiester phosphodiesterase domain containing 3 (GDPD3), mRNA.	FLJ22603; MGC4171	0.65095	0.0385277
TFF2	7032	Homo sapiens trefoil factor 2 (spasmolytic protein 1) (TFF2), mRNA.	SP; SML1	0.642296	0.0459919
KLK12	43849	Homo sapiens kallikrein-related peptidase 12 (KLK12), transcript variant 1, mRNA.	MGC42603; KLKL5; KLK-L5; DKFZp686H1078	0.64179	0.0391173
AKR1B10	57016	Homo sapiens aldo-keto reductase family 1, member B10 (aldose reductase) (AKR1B10), mRNA.	ARL-1; AKR1B11; HSI; AKR1B12; ALDRLn; MGC14103; HIS; ARL1	0.636376	0.0350416
KIAA1539	80256	Homo sapiens KIAA1539 (KIAA1539), mRNA.	P1.11659_5; FLJ11560; RP11-182N22.6; bA182N22.6	0.632548	0.0434685
LIPG	9388	Homo sapiens lipase, endothelial (LIPG), mRNA.	EL; PRO719; EDL	0.628663	0.0350416
KRT8P9	390601	PREDICTED: Homo sapiens misc_RNA (KRT8P9), miscRNA.		0.62642	0.0457254
DHCR24	1718	Homo sapiens 24-dehydrocholesterol reductase (DHCR24), mRNA.	Nbla03646; seladin-1; SELADIN1; KIAA0018	0.610228	0.0467574
LGALS3	3958	Homo sapiens lectin, galactoside-binding, soluble, 3 (galectin 3) (LGALS3), mRNA.	GAL3; MAC2; LGALS2; CBP35; GALBP	0.604787	0.0369645
MUC1	4582	Homo sapiens mucin 1, cell surface associated (MUC1), transcript variant 5, mRNA.	PEMT; PUM; PEM; EMA; H23AG; MAM6; CD227	0.601562	0.0481656
PLCXD1	55344	Homo sapiens phosphatidylinositol-specific phospholipase C, X domain containing 1 (PLCXD1), mRNA.	LL0XNC01-136G2.1; FLJ11323	0.598826	0.0366711
DUSP6	1848	Homo sapiens dual specificity phosphatase 6 (DUSP6), transcript variant 2, mRNA.	MKP3; PYST1	0.594745	0.0434685
OASL	8638	Homo sapiens 2'-5'-oligoadenylate synthetase-like (OASL), transcript variant 2, mRNA.	p59OASL; TRIP14	0.571872	0.0467574
CDC45L	8318	Homo sapiens CDC45 cell division cycle 45-like (S. cerevisiae) (CDC45L), mRNA.	CDC45L2; CDC45; PORC-PI-1	0.555534	0.0467574
PLAUR	5329	Homo sapiens plasminogen activator, urokinase receptor (PLAUR), transcript variant 2, mRNA.	CD87; UPAR; URKR	0.551989	0.0398431
UPP1	7378	Homo sapiens uridine phosphorylase 1 (UPP1), transcript variant 1, mRNA.	UP; UPASE; UDRPASE; UPP	0.513141	0.0481656
CEP55	55165	Homo sapiens centrosomal protein 55kDa (CEP55), mRNA.	URCC6; C10orf3; FLJ10540	0.502786	0.0467574
