# Supplementary figures and images for: Mucosal effects of tenofovir 1% gel
Source: eLife journal article supplement (doi:10.7554/elife.04525), 2015-02-03

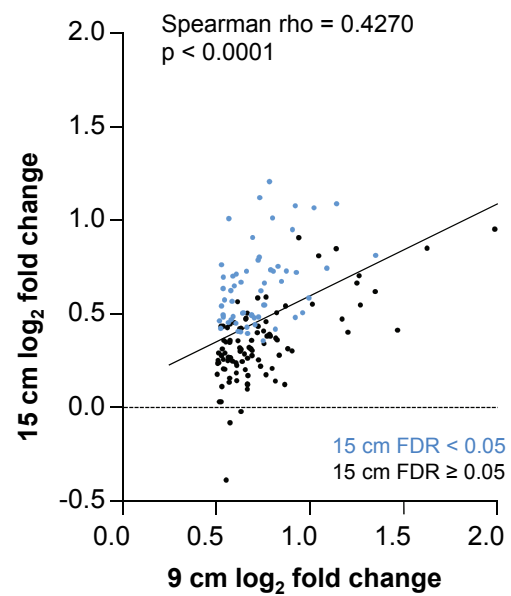

Figure 1 – figure supplement 1

Supplement: supp [file elife_poa_e04525_Figure_1_Figure_Supplement_1.pdf › elife_poa_e04525_Figure_1_Figure_Supplement_1.pdf]

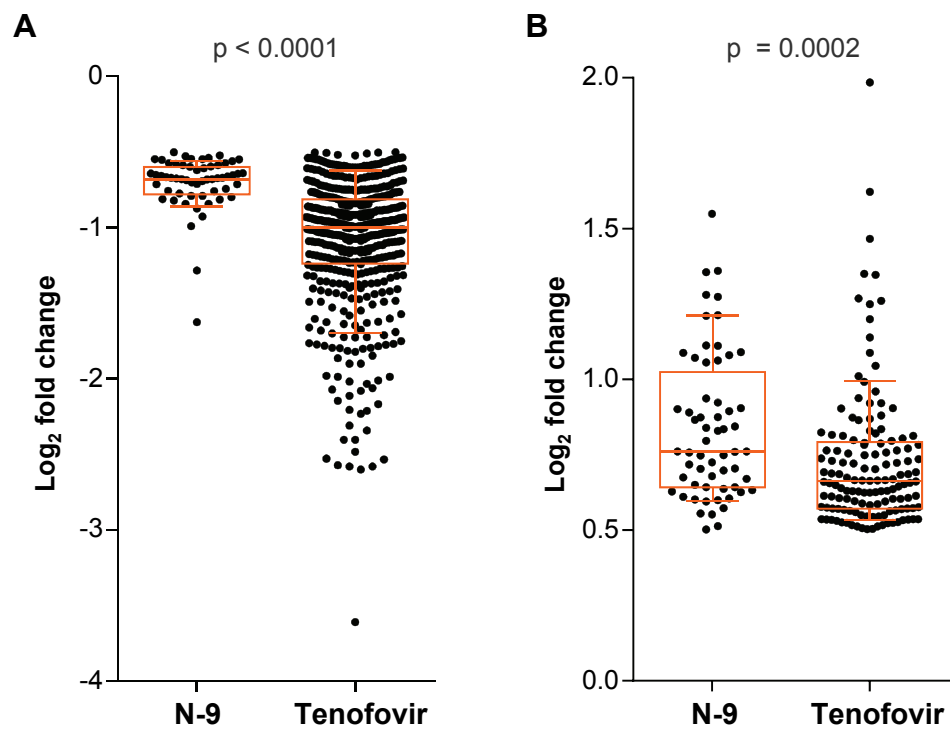

Figure 1 – figure supplement 2

Supplement: supp [file elife_poa_e04525_Figure_1_Figure_Supplement_2.pdf › elife_poa_e04525_Figure_1_Figure_Supplement_2.pdf]

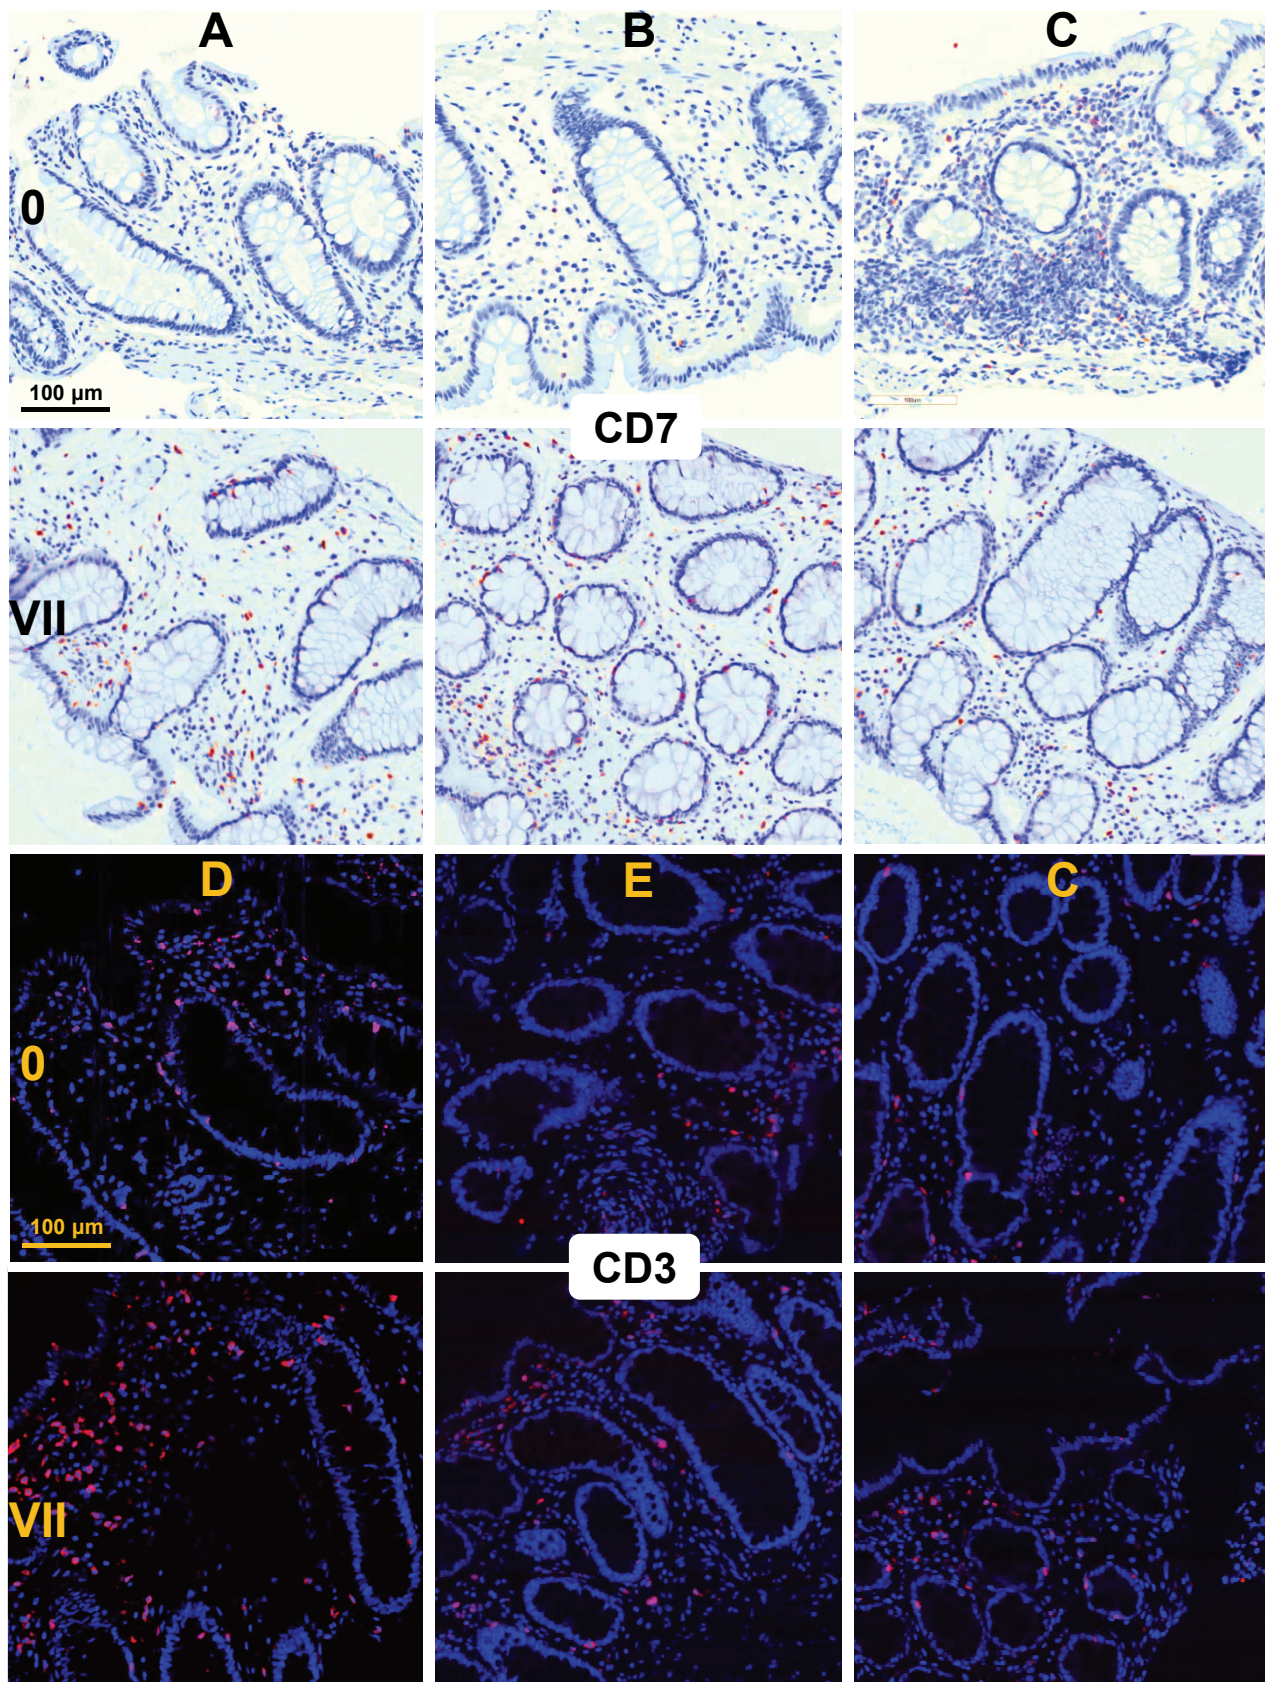

Figure 2 – figure supplement 1

Supplement: supp [file elife_poa_e04525_Figure_2_Figure_Supplement_1.pdf › elife_poa_e04525_Figure_2_Figure_Supplement_1.pdf]

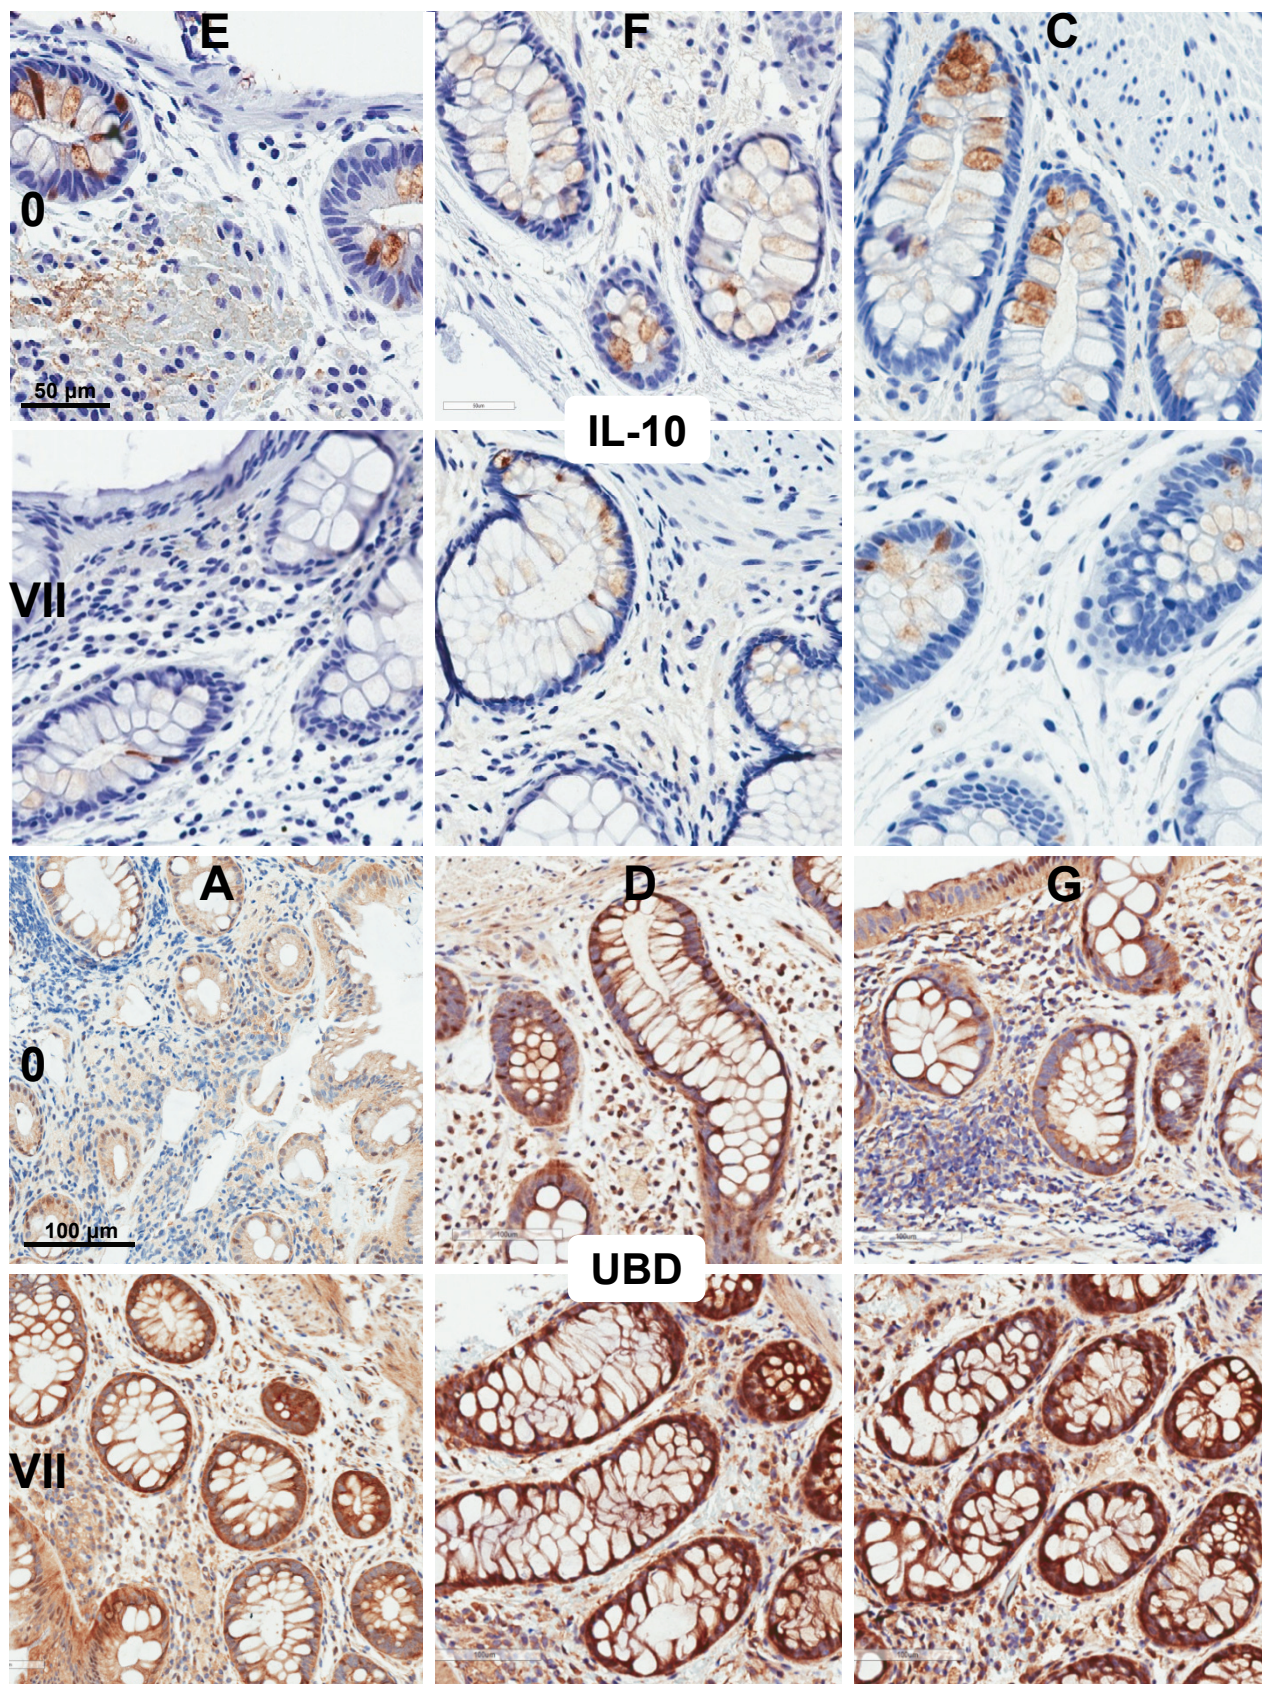

Figure 2 – figure supplement 2

Supplement: supp [file elife_poa_e04525_Figure_2_Figure_Supplement_2.pdf › elife_poa_e04525_Figure_2_Figure_Supplement_2.pdf]

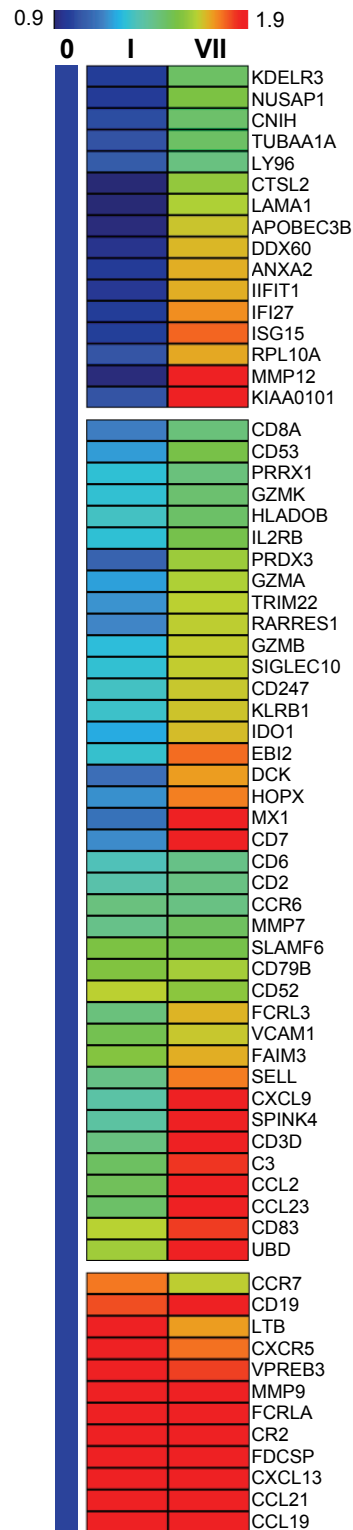

Figure 3 – figure supplement 1

Supplement: supp [file elife_poa_e04525_Figure_3_Figure_Supplement_1.pdf › elife_poa_e04525_Figure_3_Figure_Supplement_1.pdf]

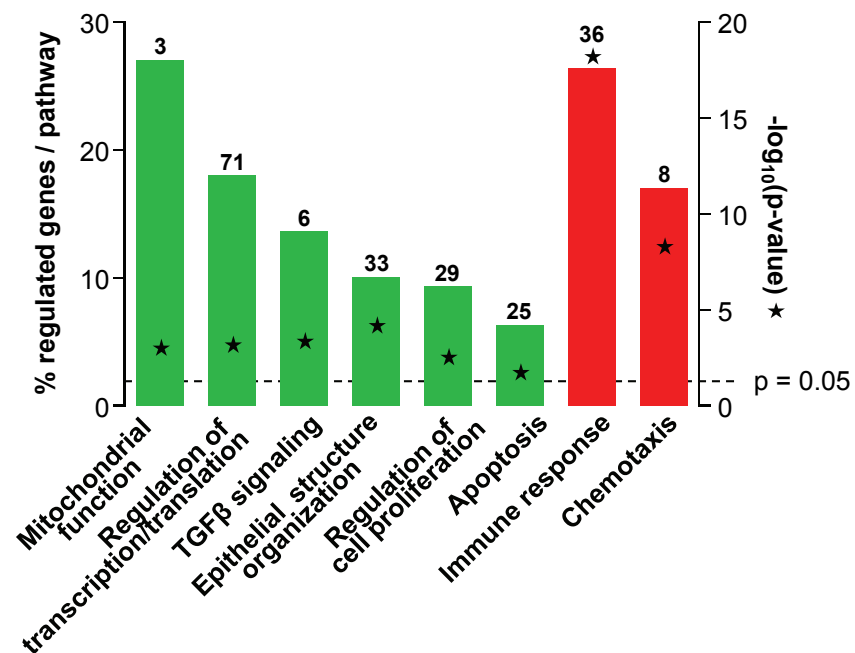

Figure 3 – figure supplement 2

Supplement: supp [file elife_poa_e04525_Figure_3_Figure_Supplement_2.pdf › elife_poa_e04525_Figure_3_Figure_Supplement_2.pdf]
